# Supplementary material for: Prevalence of TB symptoms, diagnosis and treatment among people living with HIV (PLHIV) not on ART presenting at outpatient clinics in South Africa and Kenya: baseline results from a clinical trial
Source: PubMed Central journal article supplement (PMC7476481; doi:10.1136/bmjopen-2019-035794), 2020-09-06
Supplement: bmjopen-2019-035794.draft_revisions.pdf [file bmjopen-2019-035794.draft_revisions.pdf]

# BMJ Open

BMJ Open is committed to open peer review. As part of this commitment we make the peer review history of every article we publish publicly available.

When an article is published we post the peer reviewers' comments and the authors' responses online. We also post the versions of the paper that were used during peer review. These are the versions that the peer review comments apply to.

The versions of the paper that follow are the versions that were submitted during the peer review process. They are not the versions of record or the final published versions. They should not be cited or distributed as the published version of this manuscript.

BMJ Open is an open access journal and the full, final, typeset and author-corrected version of record of the manuscript is available on our site with no access controls, subscription charges or pay-per-view fees (<http://bmjopen.bmj.com>).

If you have any questions on BMJ Open's open peer review process please email [info.bmjopen@bmj.com](mailto:info.bmjopen@bmj.com)

# BMJ Open

## Prevalence of TB symptoms, diagnosis and treatment among HIV-positive adults in the not yet on ART presenting at outpatient clinics in South Africa and Kenya

|                               |                                                                                                                                                                                                                                                                                                                                                                                                                                                                                                                                                                                                                                                                                                                                                                                                                                                                                                                                                                                                                                                                                                                                                                                                                                                                                                                                                                                                                                                                                                                                                                                                                                                                                                                                                                                          |
|-------------------------------|------------------------------------------------------------------------------------------------------------------------------------------------------------------------------------------------------------------------------------------------------------------------------------------------------------------------------------------------------------------------------------------------------------------------------------------------------------------------------------------------------------------------------------------------------------------------------------------------------------------------------------------------------------------------------------------------------------------------------------------------------------------------------------------------------------------------------------------------------------------------------------------------------------------------------------------------------------------------------------------------------------------------------------------------------------------------------------------------------------------------------------------------------------------------------------------------------------------------------------------------------------------------------------------------------------------------------------------------------------------------------------------------------------------------------------------------------------------------------------------------------------------------------------------------------------------------------------------------------------------------------------------------------------------------------------------------------------------------------------------------------------------------------------------|
| Journal:                      | <i>BMJ Open</i>                                                                                                                                                                                                                                                                                                                                                                                                                                                                                                                                                                                                                                                                                                                                                                                                                                                                                                                                                                                                                                                                                                                                                                                                                                                                                                                                                                                                                                                                                                                                                                                                                                                                                                                                                                          |
| Manuscript ID                 | bmjopen-2019-035794                                                                                                                                                                                                                                                                                                                                                                                                                                                                                                                                                                                                                                                                                                                                                                                                                                                                                                                                                                                                                                                                                                                                                                                                                                                                                                                                                                                                                                                                                                                                                                                                                                                                                                                                                                      |
| Article Type:                 | Original research                                                                                                                                                                                                                                                                                                                                                                                                                                                                                                                                                                                                                                                                                                                                                                                                                                                                                                                                                                                                                                                                                                                                                                                                                                                                                                                                                                                                                                                                                                                                                                                                                                                                                                                                                                        |
| Date Submitted by the Author: | 19-Nov-2019                                                                                                                                                                                                                                                                                                                                                                                                                                                                                                                                                                                                                                                                                                                                                                                                                                                                                                                                                                                                                                                                                                                                                                                                                                                                                                                                                                                                                                                                                                                                                                                                                                                                                                                                                                              |
| Complete List of Authors:     | <p>Brennan, Alana; Boston University, Departments of Global Health &amp; Epidemiology; Health Economics and Epidemiology Research Office, Department of Internal Medicine, School of Clinical Medicine, Faculty of Health Sciences, University of the Witwatersrand</p> <p>Maskew, Mhairi; Health Economics and Epidemiology Research Office, Department of Internal Medicine, School of Clinical Medicine, Faculty of Health Sciences, University of the Witwatersrand</p> <p>Larson, Bruce; Boston University, Department of Global Health</p> <p>Tsikhutsu, Isaac; Kenya Medical Research Institute; Henry M. Jackson Foundation Medical Research International</p> <p>Bii, Margaret; Kenya Medical Research Institute; Henry M. Jackson Foundation Medical Research International</p> <p>Vezi, Lungi; Health Economics and Epidemiology Research Office, Department of Internal Medicine, School of Clinical Medicine, Faculty of Health Sciences, University of the Witwatersrand</p> <p>Fox, Matt; Boston University, Departments of Global Health &amp; Epidemiology; Health Economics and Epidemiology Research Office, Department of Internal Medicine, School of Clinical Medicine, Faculty of Health Sciences, University of the Witwatersrand</p> <p>Venter, WD Francois; Ezintsha, Wits Reproductive Health and HIV Institute, Department of Internal Medicine, School of Clinical Medicine, Faculty of Health Sciences, University of the Witwatersrand</p> <p>Ehrenkranz, Peter; Bill and Melinda Gates Foundation</p> <p>Rosen, Sydney; Boston University, Department of Global Health; Health Economics and Epidemiology Research Office, Department of Internal Medicine, School of Clinical Medicine, Faculty of Health Sciences, University of the Witwatersrand</p> |
| Keywords:                     | Tuberculosis < INFECTIOUS DISEASES, HIV & AIDS < INFECTIOUS DISEASES, Clinical trials < THERAPEUTICS                                                                                                                                                                                                                                                                                                                                                                                                                                                                                                                                                                                                                                                                                                                                                                                                                                                                                                                                                                                                                                                                                                                                                                                                                                                                                                                                                                                                                                                                                                                                                                                                                                                                                     |
|                               |                                                                                                                                                                                                                                                                                                                                                                                                                                                                                                                                                                                                                                                                                                                                                                                                                                                                                                                                                                                                                                                                                                                                                                                                                                                                                                                                                                                                                                                                                                                                                                                                                                                                                                                                                                                          |

SCHOLARONE™  
Manuscripts

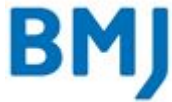

I, the Submitting Author has the right to grant and does grant on behalf of all authors of the Work (as defined in the below author licence), an exclusive licence and/or a non-exclusive licence for contributions from authors who are: i) UK Crown employees; ii) where BMJ has agreed a CC-BY licence shall apply, and/or iii) in accordance with the terms applicable for US Federal Government officers or employees acting as part of their official duties; on a worldwide, perpetual, irrevocable, royalty-free basis to BMJ Publishing Group Ltd ("BMJ") its licensees and where the relevant Journal is co-owned by BMJ to the co-owners of the Journal, to publish the Work in this journal and any other BMJ products and to exploit all rights, as set out in our [licence](#).

The Submitting Author accepts and understands that any supply made under these terms is made by BMJ to the Submitting Author unless you are acting as an employee on behalf of your employer or a postgraduate student of an affiliated institution which is paying any applicable article publishing charge ("APC") for Open Access articles. Where the Submitting Author wishes to make the Work available on an Open Access basis (and intends to pay the relevant APC), the terms of reuse of such Open Access shall be governed by a Creative Commons licence – details of these licences and which [Creative Commons](#) licence will apply to this Work are set out in our licence referred to above.

Other than as permitted in any relevant BMJ Author's Self Archiving Policies, I confirm this Work has not been accepted for publication elsewhere, is not being considered for publication elsewhere and does not duplicate material already published. I confirm all authors consent to publication of this Work and authorise the granting of this licence.

1  
2  
3 **Prevalence of TB symptoms, diagnosis and treatment among HIV-positive adults in the not yet on**  
4 **ART presenting at outpatient clinics in South Africa and Kenya**  
5  
6

7 **Short title:** TB symptoms at ART initiation  
8

9 Alana T Brennan<sup>1,2,3\*</sup>, Mhairi Maskew<sup>3\*</sup>, Bruce A Larson<sup>1,6\*</sup>, Isaac Tsikhutsu<sup>4,5</sup>, Margaret Bii<sup>4,5</sup>, Lungisile  
10 Vezi<sup>3</sup>, Matthew P Fox<sup>1,2,3</sup>, Willem DF Venter<sup>6</sup>, Peter Ehrenkranz<sup>7</sup>, Sydney Rosen<sup>1,3\*</sup>  
11  
12

- 13 1. Department of Global Health, Boston University School of Public Health, Boston, Massachusetts,  
14 United States of America
- 15 2. Department of Epidemiology, Boston University School of Public Health, Boston, Massachusetts,  
16 United States of America
- 17 3. Health Economics and Epidemiology Research Office, Department of Internal Medicine, School of  
18 Clinical Medicine, Faculty of Health Sciences, University of the Witwatersrand, Johannesburg, South  
19 Africa
- 20 4. Kenya Medical Research Institute, Kericho, Kenya
- 21 5. Henry M. Jackson Foundation Medical Research International, Inc., Nairobi, Kenya
- 22 6. Ezintsha, Wits Reproductive Health and HIV Institute, Department of Internal Medicine, School of  
23 Clinical Medicine, Faculty of Health Sciences, University of the Witwatersrand, Johannesburg, South  
24 Africa
- 25 7. Bill & Melinda Gates Foundation, Seattle, Washington, United States of America  
26  
27  
28  
29

30 \*Corresponding author: Alana Brennan, [abrennan@bu.edu](mailto:abrennan@bu.edu)  
31

32 Abstract word count: 297  
33

34 Manuscript word count: 4557  
35  
36  
37  
38  
39  
40  
41  
42  
43  
44  
45  
46  
47  
48  
49  
50  
51  
52  
53  
54  
55  
56  
57  
58  
59  
60

1  
2  
3 **Objective:** Using baseline screening data and routine clinic records for intervention arm patients in the  
4 Simplified Algorithm for Treatment Eligibility (SLATE) I and II trials, we describe the prevalence of TB  
5 symptoms, diagnosis and treatment among HIV-positive adults not on ART presenting at outpatient  
6 clinics in sub-Saharan Africa. We also assessed the performance of the World Health Organization  
7 (WHO) four-symptom TB screening tool.  
8  
9

10 **Setting:** Outpatient HIV clinics in South Africa and Kenya.  
11  
12

13 **Participants:** Patients enrolled were non-pregnant, HIV-infected adults  $\geq 18$  years of age, not currently  
14 on ART and willing to provide written informed consent. A total 594 patients in South Africa and 240 in  
15 Kenya were eligible.  
16  
17

18 **Results:** The prevalence of any TB symptoms was 38% in Kenya, and 35% (SLATE I) and 47% (SLATE II) in  
19 South Africa. During SLATE I, 70% of patients in Kenya and 57% in South Africa who had  $\geq 1$  TB symptom  
20 were tested for TB. In SLATE II, 79% of patients with  $\geq 1$  TB symptom were tested. Of those, 19% tested  
21 positive for TB in Kenya. In South Africa, 15% (SLATE I) and 5% (SLATE II) were positive for TB. Of the 28  
22 TB-positive patients in both trials, 20 initiated TB treatment. The lowest median CD4 counts were  
23 among those with active TB (Kenya 124 cells/mm<sup>3</sup> (12-150); South Africa 193 cells/mm<sup>3</sup> (56-223)).  
24 When comparing the WHO four-symptom screening tool to the Xpert<sup>®</sup> test, we found increasing the  
25 number of symptoms required for a positive screen to  $\geq 3$  or 4 decreased sensitivity but increased our  
26 positive predictive value to  $>30\%$ .  
27  
28  
29

30 **Conclusions:** 80% of patients with  $\geq 1$  TB symptom were delayed ART initiation for further investigation  
31 of TB. Reconsideration of the “any symptom” rule may be appropriate, with ART initiation among  
32 patients with fewer/milder TB symptoms commencing while TB test results are pending.  
33  
34

35 **Keywords:** Tuberculosis, HIV, Antiretroviral Therapy, Randomized trial, South Africa, Kenya  
36  
37  
38  
39  
40  
41  
42  
43  
44  
45  
46  
47  
48  
49  
50  
51  
52  
53  
54  
55  
56  
57  
58  
59  
60

**Strengths and limitations of this study:**

- The World Health Organizations (WHO) current guidelines recommend delaying life-saving antiretroviral therapy (ART) among HIV-positive patients presenting for care with one or more symptoms of tuberculosis (TB)—cough, weight loss, fever, night sweats.
- Over 80% of HIV positive patients with WHO-defined TB symptoms in our study did not have TB, but experienced an unnecessary delay in initiation of ART. Reconsideration of WHO’s guidance to even “briefly” delay ART initiation based on presence of “any TB symptom” may be appropriate, with ART initiation among patients with fewer or milder symptoms commencing while TB test results are still pending.
- Study sites were all typical primary healthcare clinics in South Africa and typical hospital-based HIV clinics in Kenya, they were geographically clustered in each country, making generalizability to the rest of the country uncertain.
- The intervention arm of the study was implemented by trained study staff who achieved near-perfect fidelity to intervention procedures; we might not expect such consistent implementation in routine care settings.
- We relied heavily on routinely-collected data pertaining to TB test conduct and results, and it is likely that some TB tests were ordered but not analyzed or analyzed but not recorded. Similarly, data on events after the study enrollment visit, such as post-initiation TB diagnoses or disease, were likely incomplete, and some events may not have been reported to healthcare facilities at all.

View only

## INTRODUCTION

In 2017 the World Health Organization (WHO) began recommending rapid antiretroviral therapy (ART) initiation, including same-day ART initiation (SDI), after the results of several studies indicated that it could reduce loss to follow-up in the pre-ART period[1-3]. The possibility of co-infection with tuberculosis (TB), however, remains a major reason for delaying ART among those with with the TB symptoms on the WHO four-symptom TB screen (cough, weight loss, fever, night sweats). This symptom screen has been shown to have good sensitivity (89%) but poor specificity (28%) in ART naïve HIV-positive patients[4]. According to the WHO and national guidelines in both South Africa[5] and Kenya[6], patients who report  $\geq 1$  TB symptoms require further investigation for active TB disease before ART initiation, which entails a laboratory test such as Xpert<sup>®</sup> MTB/RIF. Following the TB test, patients with negative results resume regular procedures for ART initiation, while those found to have TB are started on TB therapy, with ART initiation delayed until patients are regarded as stable on TB treatment. As a second clinic visit is typically required to receive TB test results, SDI may be impossible for patients presenting with TB symptoms.

The Simplified Algorithm for Treatment Eligibility (SLATE) I study in South Africa and Kenya[7] and the SLATE II study in South Africa[8] evaluated a clinical algorithm to assess eligibility for rapid ART initiation in patients presenting for HIV care but not currently on ART. The algorithms distinguished between patients eligible for SDI of ART and patients requiring referral to clinic staff for additional standard of care evaluation and TB treatment before ART initiation. One or more symptoms of TB—cough, fever, weight loss or night sweats—of any duration or intensity were among the criteria for referral in SLATE I. SLATE II revised the SLATE I algorithm to allow patients with mild TB symptoms and a negative lipoarabinomannan assay(LAM) test[9] to initiate on the same day, based on clinician judgement.

The purpose of this analysis is to describe the prevalence of TB symptoms among patients presenting for HIV care but not currently on ART and to estimate rates of TB testing, diagnosis, and treatment using baseline screening data and routine clinic records for intervention arm patients in the SLATE I and

1  
2  
3 II clinical trials in South Africa and Kenya. We also assessed the performance of the WHO four-  
4 symptom TB screening tool compared to Xpert® MTB/RIF sputum testing. The implications of current  
5 TB screening, diagnosis, and treatment for implementation of SDI are discussed.  
6  
7  
8  
9

## 10 **METHODS**

### 11 *SLATE trials*

12  
13 The SLATE I and SLATE II trials in South Africa and Kenya were multicenter trials evaluating two  
14 variations of a simplified algorithm to determine eligibility for SDI of ART without relying on laboratory  
15 results or multiple clinic visits[7, 8]. Enrollment for SLATE I (NCT02891135) was completed in July 2017  
16 in South Africa and April 2018 in Kenya. Enrollment for SLATE II (NCT03315013), only conducted in  
17 South Africa, was completed in September 2018.  
18  
19  
20  
21  
22  
23  
24  
25

### 26 *Study population*

27 Patient inclusion and exclusion criteria for study eligibility have been described previously [7,8]. Briefly,  
28 those enrolled were non-pregnant, HIV-infected adults  $\geq 18$  years of age, not currently on ART and  
29 willing to provide written informed consent, who were randomized 1:1 to the intervention and  
30 standard of care arms. This analysis is limited to patients randomized to the intervention arm, for  
31 whom we have TB symptom data. Symptom screening of patients in the standard of care arm was  
32 poorly documented by clinic staff. Intervention arm patients were assessed for eligibility for SDI by a  
33 study nurse (South Africa) or clinical officer (Kenya) using the SLATE I or II algorithm, which each  
34 consisted of four screens: (1) current symptoms, (2) recent medical history, (3) physical conditions, and  
35 (4) treatment readiness (see Supplementary Figure 1 and Supplementary Figure 2). The baseline  
36 characteristics of these patients have previously been described[10].  
37  
38  
39  
40  
41  
42  
43  
44  
45  
46  
47

48 Approval of the SLATE trials was provided by the Human Research Ethics Committee of the University  
49 of the Witwatersrand in South Africa (SLATE I 160910; SLATE II 171011), the Kenya Medical Research  
50 Institute (SLATE I 3408) and the Walter Reed Army Institute of Research in Kenya (SLATE I 2401) , and  
51 the Institutional Review Board of Boston University (SLATE I H-35634; SLATE II H-37010).  
52  
53  
54  
55  
56  
57  
58  
59  
60



1  
2  
3 Patients were not involved in the design, recruitment or conduct of the SLATE trials. We conducted a  
4 qualitative study at the end of SLATE II to help gain a deeper understanding of patient perceptions of  
5 initiating ART per standard of care compared to same-day initiation using the SLATE algorithm.  
6  
7 Presentation of primary study results will be conducted by study staff at participating clinics to  
8  
9 disseminate research findings to staff and patients prior to funding ending in July 2020.  
10  
11  
12  
13

#### 14 *TB screening and diagnosis differences between SLATE I and SLATE II*

15  
16 The main difference between the algorithm used in SLATE I and the revised version used in SLATE II  
17 was the approach to TB screening and diagnosis. Both algorithms asked patients for self-reported TB  
18 symptoms (cough, fever, weight loss, or night sweats), based on the WHO four-symptom screen[11].  
19  
20 Procedures differed from that point forward, as described below and illustrated in supplementary  
21  
22 figures 1 and 2.  
23  
24  
25  
26

27 In SLATE I, consistent with national guidelines in both countries, patients reporting any symptoms of TB  
28 of any severity or duration were referred to routine clinic care, which should have included a TB test  
29 according to guidelines. Each patient was given a referral letter for the clinic indicating the reason for  
30 referral, such as the presence of TB symptoms, but no further effort was made by study staff to ensure  
31 that the patient remained in care or was tested or treated for TB.  
32  
33  
34  
35  
36  
37

38 As has previously been reported[12], in SLATE I and illustrated in Figures 1 and 2, a larger proportion of  
39 intervention arm patients than expected were ineligible for SDI due to TB symptoms (38% in Kenya and  
40 37% in South Africa). The presence of  $\geq 1$  more TB symptoms was by far the main reason for ineligibility  
41 under the SLATE I algorithm. Very few of these patients were ultimately confirmed to have TB,  
42 however, and study patients reported no TB-related adverse events after starting ART. We thus  
43 speculated that referring a patient out for mild TB symptoms, without further complications, was too  
44 stringent a requirement, and we developed the SLATE II algorithm accordingly.  
45  
46  
47  
48  
49  
50  
51

52 In SLATE II, if a patient reported  $\geq 1$  TB symptoms, the newly developed TB module in the algorithm was  
53 applied. The TB module included: (1) a more detailed medical history (e.g. inquiring about severity and  
54  
55  
56  
57  
58  
59  
60

1  
2  
3 duration of symptoms); (2) a focused physical examination to assess TB symptoms; (3) sputum  
4 collection for Xpert® MTB/RIF sputum testing; and (4) a point-of-care, urine-based LAM test[9].  
5  
6 Patients with a positive LAM test, TB symptoms that were severe or of long duration, or any other  
7 clinical finding indicating active TB were referred back to routine care under the SLATE II algorithm. As  
8  
9 with SLATE I, no effort was made by study staff to ensure that the patient actually underwent a TB test  
10 once referred back to routine care. A patient with a negative LAM test and without severe symptoms  
11  
12 of TB remained eligible for same day initiation of ART. For SLATE II, unlike SLATE I, the study staff  
13  
14 collected a sputum sample from all intervention arm patients who were able to produce one,  
15  
16 regardless of TB symptoms. These samples were sent to the National Health Laboratory Service for  
17  
18 Xpert® MTB/RIF sputum testing for TB disease.  
19  
20  
21  
22

### 23 *Data collection*

24  
25 We collected demographic and algorithm data for intervention arm patients via a case report form  
26 administered at study enrollment. Laboratory tests results (e.g., CD4 counts and Xpert® MTB/RIF  
27 findings) were extracted directly from laboratory electronic records or paper-based registers kept at  
28 each site, while follow-up data for the study period were collected from routinely generated clinical  
29 record data from patient records in electronic and paper format.  
30  
31  
32  
33  
34  
35

### 36 *Statistical analysis*

37  
38 Simple descriptive statistics were used to display demographic and clinical characteristics of patients at  
39 study enrollment, prevalence of TB symptoms, TB diagnosis and TB treatment.  
40  
41  
42

43 Having Xpert® MTB/RIF sputum tests on the majority (n=214) of SLATE II intervention arm patients  
44 provided a unique opportunity to assess the performance of the WHO four-symptom TB screening  
45 tool. We defined 11 possible interpretations of TB symptom screening results and compared them to  
46 the gold standard of Xpert® MTB/RIF: 1) any TB symptom; 2)  $\geq 2$  symptoms; 3)  $\geq 3$  TB symptoms; 4) all 4  
47 TB symptoms; 5) cough alone; 6) fever alone; 7) weight loss alone; 8) night sweats alone; 9) cough and  
48 fever; 10) cough and night sweats and 11) cough and weight loss. We calculated the sensitivity  
49 (probability of screening positive (using each definition above) when TB disease is present as defined  
50  
51  
52  
53  
54  
55  
56  
57  
58  
59  
60

1  
2  
3 by Xpert<sup>®</sup> MTB/RIF), specificity (probability of screening negative when TB disease is not present as  
4 defined by Xpert<sup>®</sup> MTB/RIF), positive predictive value (probability of a patient having TB disease when  
5 the screen is positive) and negative predictive value (the probability of a patient not having TB disease  
6 when the screen is negative).

## 11 RESULTS

### 15 *Demographic and clinical characteristics*

16 Supplementary Table 1 summarizes basic characteristics of intervention arm patients stratified by trial  
17 cohort (N=240 for SLATE I Kenya; N=298 for SLATE I South Africa; N=296 for SLATE II). The majority of  
18 patients in each group were females in their mid-thirties, with a median baseline CD4 count between  
19 272 and 294 cells/mm<sup>3</sup>. We excluded 4 patients in Kenya and 1 in South Africa in the SLATE I trial who  
20 were known to be on TB treatment at study enrollment (Table 1). Further details of baseline  
21 characteristics of the cohorts have been reported previously[10].

### 29 *TB symptom prevalence*

30 The prevalence of any TB symptoms was 38% [95% confidence interval:32-44%] in SLATE I in Kenya,  
31 35% [30-41%] in SLATE I in South Africa, and 47% [42-53%] in SLATE II (Table 1). In both studies and  
32 both countries, amongst people with any symptom, cough (66% combined) and weight loss (72%  
33 combined) were the most common symptoms reported. As presented in Supplementary Table 2,  
34 patients with TB symptoms had substantially lower CD4 counts in all three cohorts at study enrollment  
35 than did those with no symptoms of TB, indicating more advanced HIV disease among symptomatic  
36 patients. We saw little variation in CD4 count when the data were stratified by number of symptoms or  
37 symptom type. The lowest median CD4 counts were recorded among those found to have active TB  
38 disease (Kenya 124 cells/mm<sup>3</sup> [12-150]; South Africa (SLATE I and II combined) 193 cells/mm<sup>3</sup> [56-223].

### 49 *TB testing and diagnosis among symptomatic patients*

50 In Kenya (SLATE I), 90 (38% [32-44%]) intervention arm patients had  $\geq 1$  symptom of TB and screened  
51 out of the algorithm, with referral back to standard care. Clinic staff chose or were able to test only  
52 63/90 (70% [60-79%]) symptomatic patients for TB. Of those tested, 12/63 (19% [11-30%]) had a

1  
2  
3 positive result, corresponding to an estimated TB prevalence in symptomatic patients presenting for  
4 care in Kenya of 5% [3-8%] (assuming those not tested were negative for TB disease) (Figure 1). In  
5 SLATE I in South Africa, we saw a similar proportion of patients presenting with at least 1 symptom of  
6 TB (105, 35% [30-41%]), but only 60 (57% [48-66%]) of these symptomatic patients were tested for TB  
7 by the study clinics. Of those tested, 9/60 (15% [8-26%]) had a positive result, corresponding to an  
8 estimated TB prevalence in patients presenting for care in South Africa during SLATE I of 3% [2-5%]  
9 (Figure 2), with the same assumption regarding the negative status of those not tested.  
10  
11  
12  
13  
14  
15  
16  
17

18 In SLATE II, all 296 intervention arm patients were asked for a sputum sample per the study  
19 protocol[8], regardless of symptoms. We were able to successfully collect and test sputum for 111  
20 (79% [72-85%]) symptomatic patients and 118 (76% [68-82%]) asymptomatic patients, or 72%  
21 (n=214/296) overall (Figure 3). Of the 29 symptomatic patients not tested, 25 were unable to produce  
22 a sputum sample and 4 refused to test. Among the 106 symptomatic patients in SLATE II with a  
23 successful test, 6 (5% [2-11%]) results were positive for TB, producing an estimated TB prevalence in all  
24 HIV patients (asymptomatic and symptomatic) presenting for care in South Africa during SLATE II of 2%  
25 [1-5%], with the same assumption regarding the negative status of those not tested.  
26  
27  
28  
29  
30  
31  
32  
33

34 Amongst the total of 28 TB-positive patients in both studies, 92% of patients in Kenya and 81% in South  
35 Africa (SLATE I and II combined) had at least three symptoms of the disease, and 67% in Kenya and 63%  
36 in South Africa had all four symptoms. Virtually all (96% [84-99%]) those diagnosed presented with a  
37 cough. Weight loss was also common (86% [69-95%]), followed by night sweats (82% [65-93%]) and  
38 fever (71% [53-86%]) (Table 1).  
39  
40  
41  
42  
43  
44

#### 45 *TB testing and diagnosis in asymptomatic patients*

46 Among the 337 (63% [58-67%]) patients with no TB symptoms in SLATE I, four (3% [1-6%]) patients in  
47 Kenya and 33 (17% [12-23%]) patients in South Africa were tested for TB by the study clinics. In Kenya,  
48 three of the patients had documented reasons for being tested by the clinic (one was taking cough  
49 syrup for the previous 5 days and was recently screened for TB, one had suspected extra-pulmonary TB  
50 due to swelling in the jaw, and one patient was asthmatic). The remaining patient had no documented  
51  
52  
53  
54  
55  
56  
57  
58  
59  
60

1  
2  
3 reason for a TB test. In South Africa, one of the clinics in our study was attempting to collect sputum  
4 from all HIV positive patients prior to ART initiation, regardless of symptoms. None of the 33  
5 asymptomatic patients tested were positive (Figures 1 and 2).  
6  
7  
8  
9

10 In SLATE II, as per the study protocol[8], all 296 intervention arm patients were asked for a sputum  
11 sample. We were able to successfully collect and test sputum for 118 (76% [68-93%]) asymptomatic  
12 patients (Figure 3). One positive TB test result was recorded among those who were eligible for SDI  
13 under the SLATE II algorithm. This was an asymptomatic patient who had a negative LAM test and CD4  
14 count of 350 cells/mm<sup>3</sup>. The patient was successfully traced and commenced TB treatment the  
15 following day.  
16  
17  
18  
19  
20  
21  
22

### 23 *TB LAM test results*

24 In SLATE II, all intervention arm subjects with  $\geq 1$  symptoms of TB had a LAM test performed. Only two  
25 tests (<1%) were positive. Both patients had sputum samples taken for Xpert<sup>®</sup> testing. The first patient  
26 was a male who came to the clinic for care because he felt unwell. He reported all four TB symptoms  
27 and had a CD4 count of 78 cells/mm<sup>3</sup>. This patient's result came back positive for TB and he was  
28 successfully traced and commenced on TB treatment. The second patient was a female who came for  
29 an HIV test and reported cough and weight loss and had a CD4 count of 19 cells/mm<sup>3</sup>. This patient  
30 tested negative for TB on Xpert<sup>®</sup>.  
31  
32  
33  
34  
35  
36  
37  
38  
39

### 40 *TB treatment uptake*

41 In Kenya, eight of the 12 patients (67% [38-88%]) who tested positive for TB went on to initiate  
42 treatment for the disease, all within two weeks of diagnosis. Of the remaining four patients, one died  
43 within three weeks of study enrollment with no record of starting TB treatment, and the remaining  
44 three remained in care but had no record of initiating TB treatment. Of the 16 patients (symptomatic  
45 and asymptomatic) who tested positive in SLATE I and II in South Africa, eight initiated TB treatment  
46 after diagnosis (four patients within one week and four within seven weeks after study enrolment),  
47 four patients remained in care but had no record of starting TB treatment, three patients were  
48  
49  
50  
51  
52  
53  
54  
55  
56  
57  
58  
59  
60

1  
2  
3 transferred to another facility before starting TB treatment, and one patient was lost from care before  
4 starting treatment.  
5  
6

### 7 8 *Unmasking TB disease*

9  
10 One of the major concerns about SDI is immune reconstitution inflammatory syndrome among  
11 patients with undiagnosed TB (TB-IRIS). No patients in either study (both standard of care and  
12 intervention arms) had indications in their routine clinic records of IRIS reactions during passive study  
13 follow up, though this may reflect incomplete record-keeping. Patient clinical records indicated that  
14 clinic staff investigated a total of 25 patients for TB more than 30 days after study enrollment. Of these,  
15 24 test results were available (we were unable to locate one test result in SLATE I in South Africa) and  
16 two were positive for TB disease (one positive patient was in the standard of care arm in South Africa  
17 (SLATE I) and one was in the intervention arm in Kenya (SLATE I) and not eligible for SDI). Among these  
18 24 patients with a follow-up TB test, 4 (17%) (three in SLATE I and one in SLATE II) were eligible for SDI  
19 via the SLATE algorithm, none of these patients had a positive TB test.  
20  
21  
22  
23  
24  
25  
26  
27  
28  
29

30  
31 In the rest of the results section, we will focus solely on SLATE II in South Africa, where the new TB  
32 module in the SLATE II algorithm was applied.  
33  
34  
35

### 36 *TB in symptomatic patients eligible for SDI under SLATE II algorithm*

37  
38 In the SLATE II study, patients with milder TB symptoms and a negative TB LAM test were eligible for  
39 SDI under the study at the discretion of the study nurse. Of the intervention arm patients who  
40 screened in and were eligible for SDI, 40% [34-46%] (n=101) presented with at least one of the four TB  
41 symptoms. Of these, 76% [66-83%] (n=77) reported only one symptom, 20% [13-28%] (n=20) reported  
42 two symptoms, and 4% [1-9%] (n=4) reported 3 or more symptoms. The most frequently reported  
43 symptoms were weight loss (64%) and cough (45%); night sweats (13%) and fever (6%) were less  
44 frequently reported. Of the 101 symptomatic patients, 75% [64-81%] (n=74) successfully completed a  
45 TB test (the remainder either could not produce a sputum sample or were unwilling to do so) and of  
46 these, only one tested positive for TB. This patient reported only cough and had a negative LAM test  
47 during administration of the SLATE II algorithm. After SDI, the patient, whose CD4 count was 116  
48  
49  
50  
51  
52  
53  
54  
55  
56  
57  
58  
59  
60

1  
2  
3 cells/mm<sup>3</sup>, could not be traced to start TB treatment, despite phone calls and a home visit. The patient  
4 never returned to the clinic after study enrolment for either TB or HIV care.  
5  
6  
7

### 8 *Sensitivity, specificity and predictive values of SLATE II algorithm*

9  
10 Figure 4 displays the results of the performance of the WHO four-symptom screen in SLATE II  
11 intervention arm patients. The sensitivity and specificity of any single TB symptom were 86% [47-99%]  
12 and 52% [45-59%], respectively. The positive predictive value was 6% [2-12%], while the negative  
13 predictive value was 99% [96-99%]. When modifying the definition of a positive TB screen to  $\geq 3$   
14 symptoms, sensitivity decreased to 71% [33-95%] and specificity increased to 95% [92-98%]. The  
15 positive predictive value improved to 33% [13-59%] while negative predictive value remained  
16 unchanged (99% [97-99%]). The WHO symptom screening tool appeared to perform the best for  
17 sensitivity (86% [47-99%]) and specificity (72% [66-78%]) when using cough only. However, the positive  
18 predictive value was the highest in the analysis using  $\geq 3$  (33% [13-59%]) and 4 (40% [14-71%])  
19 symptoms. In all other analyses of the WHO four-symptom screen, sensitivity falls, and specificity  
20 increases as a result, while the positive predictive value ranges from 7% to 31% depending on how the  
21 prevalence shifts. The negative predictive value remained unchanged for all analyses at above 98%.  
22 This was expected as the prevalence of TB in the population was low (3%) based on Xpert<sup>®</sup> testing.  
23  
24  
25  
26  
27  
28  
29  
30  
31  
32  
33  
34  
35  
36

## 37 **DISCUSSION**

38  
39 In three cohorts of HIV-positive patients not yet on ART and presenting for care in Kenya and South  
40 Africa since 2017, we estimated an overall prevalence of any TB symptoms of 35% to 50%. Between  
41 60% and 80% of these patients were tested for TB, among whom 19% in Kenya and 6% to 15% in South  
42 Africa had a positive TB test, corresponding to an estimated prevalence in patients presenting for care  
43 of 5% in Kenya and 2% to 3% in South Africa (assuming those not tested are negative for TB disease).  
44 The results we report for TB symptom prevalence (with cough also being the most common symptom  
45 reported) and percentage of patients with TB symptoms tested for TB reported in our study are  
46 consistent with what has been previously published at a national level in Kenya[13] and in HIV study  
47 cohorts in South Africa[14-21]. The consistency of our estimates of TB disease prevalence with  
48  
49  
50  
51  
52  
53  
54  
55  
56  
57  
58  
59  
60

1  
2  
3 previously published literature varied. Some studies report estimates that were comparable[13,14],  
4 lower[15], or higher[16-21]. National estimates of TB prevalence are still sparse in South Africa.  
5  
6  
7

8  
9 In our studies, over 80% of the 28 patients who tested positive for TB disease reported having at least  
10 three clinical symptoms of the disease, the most common being a cough, followed by weight loss, night  
11 sweats, and fever. Other studies have estimated more than 80% of patients diagnosed with TB had  
12 more than one symptom of the condition[18,19,23]. A study in South Africa also reported that more  
13 than 80% of patients without TB disease had symptoms [22], again consistent with our findings.  
14  
15  
16  
17

18  
19 Using SLATE II results, the performance of the WHO four-symptom screen tool, when classifying  
20 patients with  $\geq 1$  symptoms of TB, was comparable regarding sensitivity to what was reported in a  
21 recent meta-analysis[4], but we had a higher specificity at 52% (vs. 28%[4]). When we increased the  
22 number of symptoms required for a positive screen to  $\geq 3$  or 4, we saw a decrease in sensitivity and  
23 subsequent increase in specificity and an increase in the positive predictive value from 6% (for  $\geq 1$   
24 symptoms of TB) to 33% and 40%, respectively.  
25  
26  
27  
28  
29  
30  
31

32  
33 When delaying ART in an HIV patient is contingent on a positive TB test, the positive predictive value is  
34 what is more clinically relevant. The main reason for the delay of ART initiation in TB suspect patients is  
35 to prevent TB-IRIS. The estimated risk of TB-IRIS is quite low, however, at roughly 1% to 6% in sub-  
36 Saharan Africa[24]. Additionally, the risk is the highest in patients presenting with CD4 counts  $< 100$   
37 cells/mm<sup>3</sup>[25,26]. The median CD4 count in all three of our cohorts amongst symptomatic patients was  
38 above 100 cells/mm<sup>3</sup>, while patients presenting with no symptoms had a median CD4 count above 300  
39 cells/mm<sup>3</sup>. The lowest median CD4 counts, and those at highest risk of TB-IRIS, were amongst patients  
40 that had three if not all four symptoms of TB disease and had a positive Xpert® test. All of which were  
41 delayed ART initiation for further investigation of TB disease. In a healthcare system that can produce  
42 TB test results soon after ART initiation and successfully contact (trace) patients with positive results, it  
43 may be reasonable to increase the number of TB symptoms required to trigger a delay in ART initiation  
44 to 3 or 4. This would increase the probability that a patient who is classified as TB positive (using the  
45 WHO four-symptom screen) truly has TB disease and allow patients with fewer or milder TB symptoms  
46  
47  
48  
49  
50  
51  
52  
53  
54  
55  
56  
57  
58  
59  
60



1  
2  
3 to start ART while TB test results are pending. It is still unknown whether initiating ART prior to TB  
4 being confirmed or treated causes harm (or benefit). In a setting in which TB tests are delayed and/or  
5 active tracing of patients with positive results is poor, in contrast, a more conservative approach—  
6 delaying ART until a TB test can be completed for patients with even one symptom—may continue to  
7 be justified. However, more research is required to accurately weigh the risks of delaying ART (which  
8 might prevent a person from being successfully linked into HIV treatment) versus the benefits of  
9 waiting for a definitive TB diagnosis to minimize the already low and potentially manageable clinical  
10 risk of TB-IRIS.  
11  
12  
13  
14  
15  
16  
17  
18  
19

20 In both Kenya and South Africa, national TB guidelines during the study stated that HIV patients self-  
21 reporting any TB-related symptoms should be tested with Xpert® MTB/RIF and treated if diagnosed  
22 with the disease. In SLATE I, we saw gaps in following national guidelines in both countries. Twenty-  
23 seven symptomatic, intervention arm patients in Kenya and 45 in South Africa were ineligible for SDI  
24 due to TB symptoms and were referred back to the clinic for further testing but were not tested for TB  
25 by the clinic staff. We assume that a certain number of patients refused or were unable to provide a  
26 sputum sample for testing, but for some, the nurse or clinical officer who saw the patient chose not to  
27 do a test. At one study site in South Africa we were told, informally, that staff only requested TB tests if  
28 two or more symptoms were present, while at one site in Kenya, a clinical officer would diagnose a  
29 respiratory infection before TB and require the patient to go through a course of antibiotics, advising  
30 the patient to return for a TB test only if symptoms persisted. Whether failure to follow guidelines  
31 precisely reflects reasonable use of clinical judgment, lack of available resources, or irresponsible non-  
32 compliance on the part of clinic staff is unclear, but it should be considered in efforts to improve  
33 treatment of TB disease and maximize opportunities to offer TB preventative treatment for patients  
34 without TB.  
35  
36  
37  
38  
39  
40  
41  
42  
43  
44  
45  
46  
47  
48

49 The urine TB-LAM test was positive in <1% of our intervention arm patients in the SLATE II trial. As the  
50 TB-LAM has been shown to improve TB diagnosis in patients with low CD4 counts[27] this could be due  
51 to higher CD4 counts in our cohort. The average CD4 count in SLATE II intervention arm patients was  
52 294 cells/mm<sup>3</sup>, it was 175 cells/mm<sup>3</sup> amongst those with TB symptoms and ranged from 60-107  
53  
54  
55  
56  
57  
58  
59  
60

1  
2  
3 cells/mm<sup>3</sup> amongst those diagnosed with TB. Also, previous studies have shown that the positive  
4  
5 predictive value of urine LAM testing depends upon the prevalence of TB disease in the population,  
6  
7 which was low (6%) in our SLATE II cohort[28]. Given the TB-LAM test is part of the care package under  
8  
9 current WHO guidelines, it may not offer much benefit for the cost involved.

10  
11  
12 Our study had several limitations. First, while the study sites were all typical primary healthcare clinics  
13  
14 in South Africa and typical hospital-based HIV clinics in Kenya, they were geographically clustered in  
15  
16 each country, making generalizability to the rest of the country uncertain. Second, the intervention  
17  
18 arm of the study was implemented by trained study staff who achieved near-perfect fidelity to  
19  
20 intervention procedures; we might not expect such consistent implementation in routine care settings.  
21  
22 Third, we relied heavily on routinely-collected data pertaining to TB test conduct and results, and it is  
23  
24 likely that some TB tests were ordered but not analyzed or analyzed but not recorded. Similarly, data  
25  
26 on events after the study enrollment visit, such as post-initiation TB diagnoses or disease, were likely  
27  
28 incomplete, and some events may not have been reported to healthcare facilities at all. Finally, our  
29  
30 sample sizes were small, limiting our ability to stratify by patient characteristics; a larger sample might  
31  
32 identify other characteristics associated with a positive TB test. The small sample size could also affect  
33  
34 our ability to detect TB-related adverse events in our sample.

35  
36 Despite these limitations, we conclude that in the SLATE I and SLATE II trials, among 235 patients with  
37  
38 WHO-defined TB symptoms who were not eligible for SDI, over 80% did not have TB but experienced  
39  
40 an unnecessary delay in ART initiation. No serious, TB-related adverse events were reported after  
41  
42 starting ART among symptomatic patients with or without delay in our study. Reconsideration of  
43  
44 WHO's guidance to even "briefly" delay ART initiation based on presence of "any TB symptom" may be  
45  
46 appropriate, with ART initiation among patients with fewer or milder symptoms commencing while TB  
47  
48 test results are still pending.

### 51 **Acknowledgments**

52  
53 We thank the patients who participated in the study and the staff of the six study clinics for their  
54  
55 cooperation; the City of Johannesburg and Ekurhuleni Metro in South Africa and the management of  
56  
57  
58  
59  
60

1  
2  
3 Kericho County Referral Hospital, Kapsabet County Referral Hospital, and Kombewa County Hospital in  
4 Kenya for permission to conduct this study.  
5  
6  
7

8  
9 **Contributors:** AB, MM and BL cleaned and analysed the data. All the authors contributed substantially  
10 to the interpretation of the results and the writing of the manuscript. All the authors have read and  
11 approved the final version of the manuscript.  
12  
13  
14

15  
16 **Competing interests:** None declared.  
17  
18

19  
20 **Funding:** Research was funded by the Bill and Melinda Gates Foundation (Grant No. OPP1136158)  
21  
22

23 **Data sharing statement:** Data generated by the study will be made publicly available in the Dryad  
24 repository (<http://www.datadryad.org/>) after the protocol has been closed (anticipated closure July  
25 2020). Until then, data will remain under the supervision of the Boston University Medical Campus IRB,  
26 the University of the Witwatersrand Human Research Ethics Committee (HREC), and the KEMRI  
27 Scientific and Ethics Research Unit. Requests can be sent to the BUMC IRB at [medirb@bu.edu](mailto:medirb@bu.edu). Data  
28 extracted from routine medical records are owned by the study sites, the South African National  
29 Department of Health, and the Kenyan Ministry of Health and cannot be made publicly available by the  
30 authors.  
31  
32  
33  
34  
35  
36  
37  
38  
39  
40  
41  
42  
43  
44  
45  
46  
47  
48  
49  
50  
51  
52  
53  
54  
55  
56  
57  
58  
59  
60

## References

1. Guidelines for Managing Advanced HIV Disease and Rapid Initiation of Antiretroviral Therapy. Geneva: World Health Organization; 2017.
2. Amanyire G, Semitala FC, Namusobya J, Katuramu R, Kampiire L, Wallenta J et al. Effects of a multicomponent intervention to streamline initiation of antiretroviral therapy in Africa: a stepped-wedge cluster-randomised trial. *Lancet HIV*. 2016;3:e539–48.
3. Rosen S, Maskew M, Fox MP, Nyoni C, Mongwenyana C, Maletse G et al. Initiating antiretroviral therapy for HIV at a patient's first clinic visit: the RapIT Randomized Controlled Trial. *PLoS Med*. 2016;13:e1002015.
4. Hamada Y, Lujan J, Schenkel K, Ford N, Getahun H. Sensitivity and specificity of WHO's recommended four-symptom screening rule for tuberculosis in people living with HIV: a systematic review and meta-analysis. *Lancet HIV*. 2018 Sep;5(9):e515-e523.
5. National Department of Health. Same-day antiretroviral therapy (ART) initiation for HIV positive patients. Pretoria: National Department of Health; 2017.
6. Ministry of Health and National AIDS and STI Control Program (NASCOP). Guidelines on the Use of Antiretroviral Drugs for Treating and Preventing HIV Infection in Kenya 2018 Edition. Nairobi, Kenya; 2018.
7. Rosen S, Fox MP, Larson BA, Brennan AT, Maskew M, Tsikhutsu I, Bii M, Ehrenkranz PD, Venter WF. Simplified clinical algorithm for identifying patients eligible for immediate initiation of antiretroviral therapy for HIV (SLATE): protocol for a randomised evaluation. *BMJ Open*. 2017 May 28;7(5):e016340.
8. Rosen S, Maskew M, Brennan AT, Fox MP, Vezi L, Ehrenkranz PD, Venter WDF. Improved simplified clinical algorithm for identifying patients eligible for immediate initiation of antiretroviral therapy for HIV (SLATE II): protocol for a randomized evaluation. *Trials*. 2018 Oct 11;19(1):548.
9. World Health Organization. The use of lateral flow urine lipoarabinomannan assay (LF-LAM) for the diagnosis and screening of active tuberculosis in people living with HIV TB. Geneva: World Health Organization, 2015.
10. Brennan A, Maskew M, Larson B, Tsikhutsu I, Bii M, Vezi L, Fox M, Venter F, Ehrenkranz P, Rosen S. Who is seeking antiretroviral treatment for HIV now? Characteristics of patients presenting in Kenya and South Africa in 2017-2018. *J Int AIDS Soc*; in press.
11. World Health Organization. Systematic screening for active tuberculosis Principles and recommendations. Geneva: World Health Organization, 2013.
12. Maskew M, Larson B, Brennan AT, Fox MP, Vezi L, Tsikhutsu I, Bii M, Venter WDF, Rosen S. Same-day ART initiation without laboratory tests is safe and effective: primary outcomes of the SLATE trial in South Africa and Kenya. *PLoS Medicine*. 2019.
13. Kenya Tuberculosis Prevalence Survey. Republic of Kenya. Ministry of Health. 2016. Available at: <https://www.chskenya.org/wp-content/uploads/2018/04/Final-TB-Prevalence-Survey-Report.pdf>.
14. Rangaka MX, Wilkinson RJ, Glynn JR, Boulle A, van Cutsem G, Goliath R, et al. Effect of antiretroviral therapy on the diagnostic accuracy of symptom screening for intensified tuberculosis case finding in a south African HIV clinic. *Clin Infect Dis*. 2012;55(12):1698–706.

15. Hanrahan CF, Nonyane BAS, Mmolawa L, West NS, Siwelana T, Lebina L, Martinson N, Dowdy DW. Contact tracing versus facility-based screening for active TB case finding in rural South Africa: A pragmatic cluster-randomized trial (Kharitode TB). *PLoS Med*. 2019 Apr 30;16(4):e1002796.
16. Bajema KL, Bassett IV, Coleman SM, Ross D, Freedberg KA, Wald A, Drain PK. Subclinical tuberculosis among adults with HIV clinical features and outcomes in a South African cohort. *BMC Infect Dis*. 2019 Jan 5;19(1):14. doi: 10.1186/s12879-018-3614-7. PubMed PMID: 30611192; PubMed Central PMCID: PMC6321698.
17. Bassett IV, Wang B, Chetty S, Giddy J, Losina E, Mazibuko M, et al. Intensive tuberculosis screening for HIV-infected patients starting antiretroviral therapy in Durban. South Africa *Clin Infect Dis*. 2010;51(7):823–9.
18. Kerkhoff AD, Wood R, Lowe DM, Vogt M, Lawn SD. Blood neutrophil counts in HIV-infected patients with pulmonary tuberculosis: association with sputum mycobacterial load. *PLoS One*. 2013;8(7):e67956.
19. Ahmad Khan F, Verkuil S, Parrish A, Chikwava F, Ntuny R, El-Sadr W, et al. Performance of symptom-based tuberculosis screening among people living with HIV: not as great as hoped. *AIDS*. 2014;28(10):1463–72.
20. Lawn SD, Brooks SV, Kranzer K, Nicol MP, Whitelaw A, Vogt M, et al. Screening for HIV-associated tuberculosis and rifampicin resistance before antiretroviral therapy using the Xpert MTB/RIF assay: a prospective study. *PLoS Med*. 2011;8(7):e1001067.
21. Kranzer K, Houben RM, Glynn JR, Bekker LG, Wood R, Lawn SD. Yield of HIV-associated tuberculosis during intensified case finding in resource-limited settings: a systematic review and meta-analysis. *Lancet Infect Dis*. 2010 Feb;10(2):93-102.
22. Human Sciences Research Council (HSRC). National Tuberculosis Prevalence Survey underway. February 2018. Available at: <http://www.hsrc.ac.za/en/media-briefs/saph/national-tb-prevalance-survey-underway>
23. Swindells S, Komarow L, Tripathy S, Cain KP, MacGregor RR, Achkar JM, et al. Screening for pulmonary tuberculosis in HIV-infected individuals: AIDS Clinical Trials Group protocol A5253. *Int J Tuberc Lung Dis*. 2013;17(4):532–9.
24. Walker NF, Stek C, Wasserman S, Wilkinson RJ, Meintjes G. The tuberculosis-associated immune reconstitution inflammatory syndrome: recent advances in clinical and pathogenesis research. *Curr Opin HIV AIDS*. 2018 Nov;13(6):512-521.
25. Manabe YC, Campbell JD, Sydnor E, Moore RD. Immune reconstitution inflammatory syndrome: risk factors and treatment implications. *J Acquir Immune Defic Syndr*. 2007 Dec 1;46(4):456-62.
26. Cain KP, McCarthy KD, Heilig CM, Monkongdee P, Tasaneeyapan T, Kanara N, et al. An algorithm for tuberculosis screening and diagnosis in people with HIV. *N Engl J Med*. 2010 Feb 25;362(8):707-16.
27. Huerga H et al. Diagnostic value of the urine lipoarabinomannan assay in HIV-positive, ambulatory patients with CD4 below 200 cells/ $\mu$ l in 2 low-resource settings: a prospective observational study. *PLoS Medicine* 16(4): e1002792, 2019.

- 1  
2  
3 28. Drain PK, Gounder L, Sahid F, Moosa MY. Rapid Urine LAM Testing Improves Diagnosis of  
4 Expectorated Smear-Negative Pulmonary Tuberculosis in an HIV-endemic Region. Sci Rep. 2016 Feb  
5 11;6:19992.  
6  
7  
8  
9  
10  
11  
12  
13  
14  
15  
16  
17  
18  
19  
20  
21  
22  
23  
24  
25  
26  
27  
28  
29  
30  
31  
32  
33  
34  
35  
36  
37  
38  
39  
40  
41  
42  
43  
44  
45  
46  
47  
48  
49  
50  
51  
52  
53  
54  
55  
56  
57  
58  
59  
60

For peer review only

**Table 1. Self-reported TB symptoms, TB diagnosis, and TB treatment uptake among patients who screened out due to TB symptoms in the intervention arms of the SLATE I and SLATE II trials**

| Variable (% responding yes)                                       | Kenya                  | South Africa           | South Africa            |
|-------------------------------------------------------------------|------------------------|------------------------|-------------------------|
|                                                                   | (SLATE I)<br>(N = 240) | (SLATE I)<br>(N = 298) | (SLATE II)<br>(N = 296) |
|                                                                   | n (%)                  | n (%)                  | n (%)                   |
| <b>Screened for TB</b>                                            | 240 (100)              | 298 (100)              | 296 (100)               |
| <b>Currently on TB treatment*</b>                                 | 4 (2)                  | 2 (1)                  | 0 (0)                   |
| <b>1 or more TB symptoms</b>                                      | 90 (38)                | 105 (35)               | 140 (47)                |
| <b>Symptoms reported (among patients with 1 or more symptoms)</b> |                        |                        |                         |
| Cough (current)                                                   | 75 (83)                | 71 (68)                | 76 (54)                 |
| Fever                                                             | 53 (59)                | 45 (43)                | 20 (14)                 |
| Night sweats                                                      | 56 (62)                | 44 (42)                | 29 (21)                 |
| Weight loss                                                       | 72 (80)                | 76 (72)                | 96 (69)                 |
| <b>Number of symptoms reported (n)</b>                            |                        |                        |                         |
| 1 symptom                                                         | 13 (14)                | 36 (34)                | 89 (64)                 |
| 2 symptoms                                                        | 18 (20)                | 27 (26)                | 32 (23)                 |
| 3 symptoms                                                        | 29 (32)                | 22 (21)                | 8 (6)                   |
| 4 symptoms                                                        | 30 (33)                | 20 (19)                | 11 (8)                  |
| <b>TB test performed in symptomatic patients</b>                  |                        |                        |                         |
| <b>Positive TB tests among symptomatic patients</b>               | 12 (13)                | 9 (9)                  | 6 (5)                   |
| <b>Symptoms among those testing positive</b>                      |                        |                        |                         |
| Cough (current)                                                   | 12 (100)               | 9 (100)                | 6 (86)                  |
| Fever                                                             | 9 (75)                 | 7 (78)                 | 4 (57)                  |
| Night sweats                                                      | 12 (100)               | 7 (78)                 | 4 (57)                  |
| Weight loss                                                       | 10 (83)                | 9 (100)                | 5 (71)                  |

\*Excluded from analyses

Figure 1. TB testing flow chart at study enrollment among 240 SLATE I intervention arm participants Kenya

1  
2  
3  
4  
5  
6  
7  
8  
9  
10  
11  
12  
13  
14  
15  
16  
17  
18  
19  
20  
21  
22  
23  
24  
25  
26  
27  
28  
29  
30  
31  
32  
33  
34  
35  
36  
37  
38  
39  
40  
41  
42  
43  
44  
45  
46  
47  
48  
49  
50  
51  
52  
53  
54  
55  
56  
57  
58  
59  
60

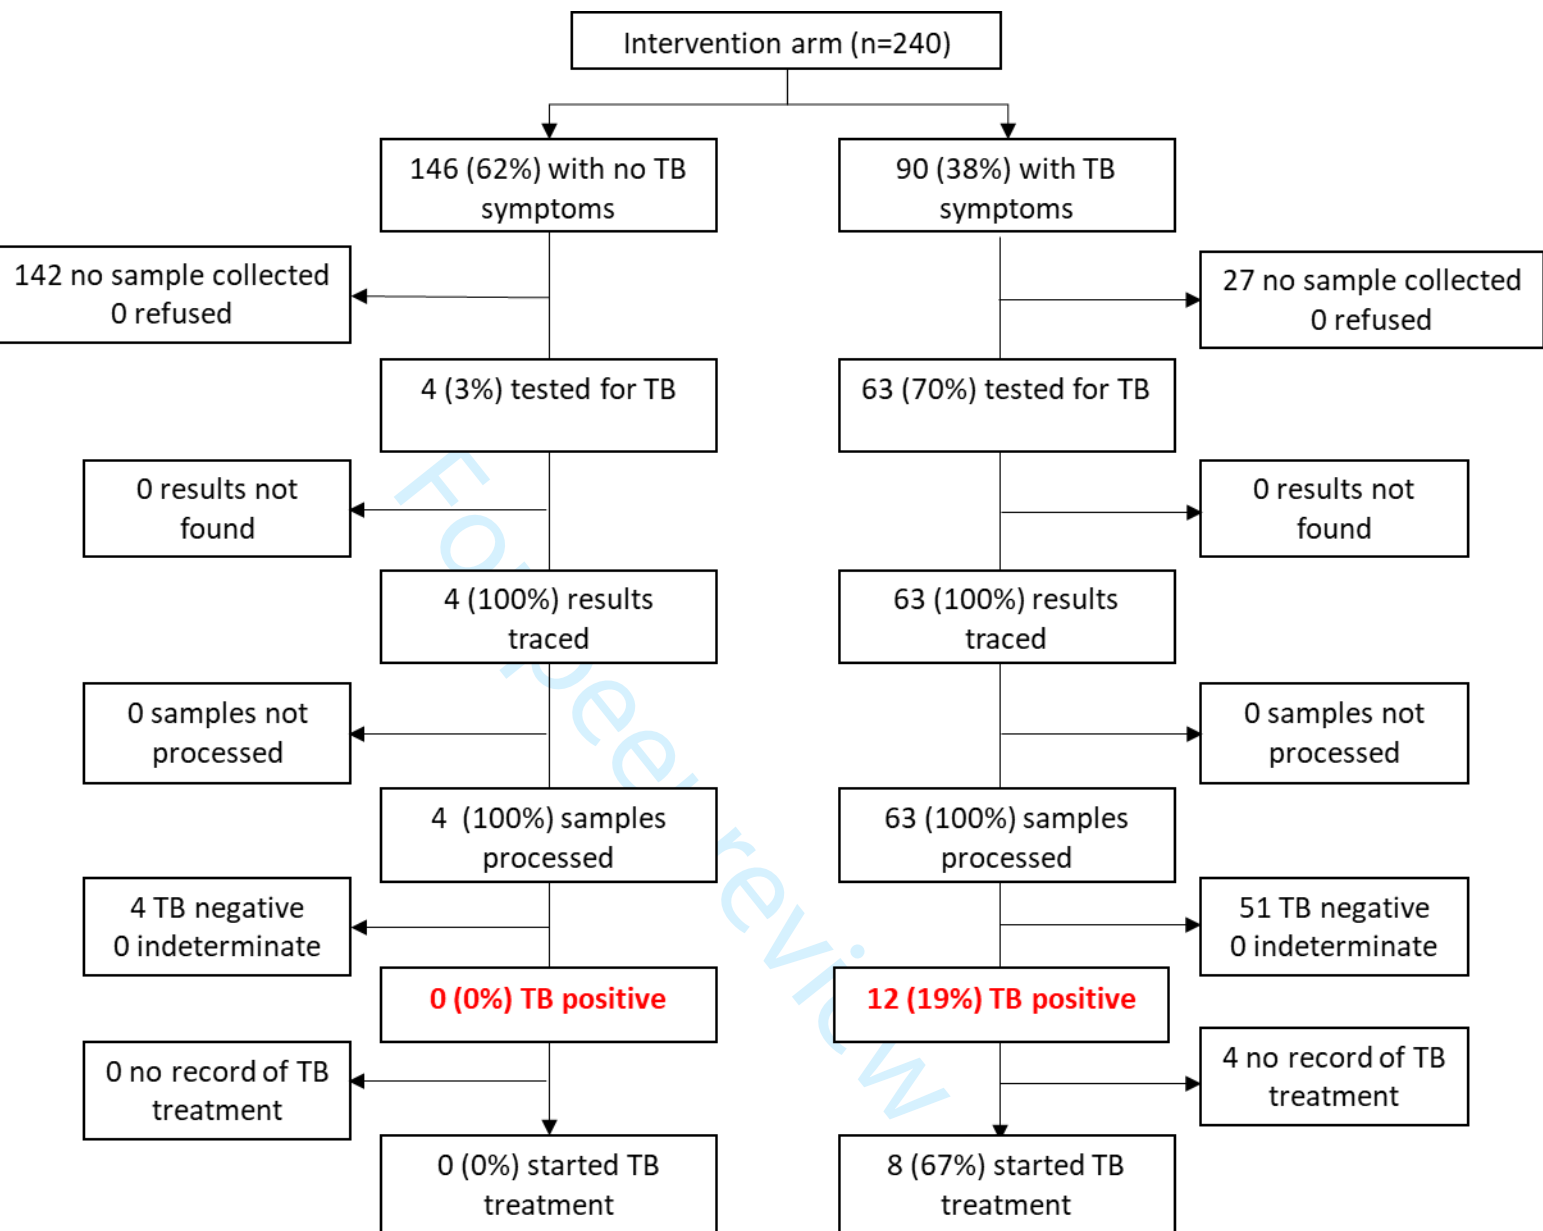



Figure 2. TB testing flow chart at study enrollment among 298 SLATE I intervention arm participants South Africa

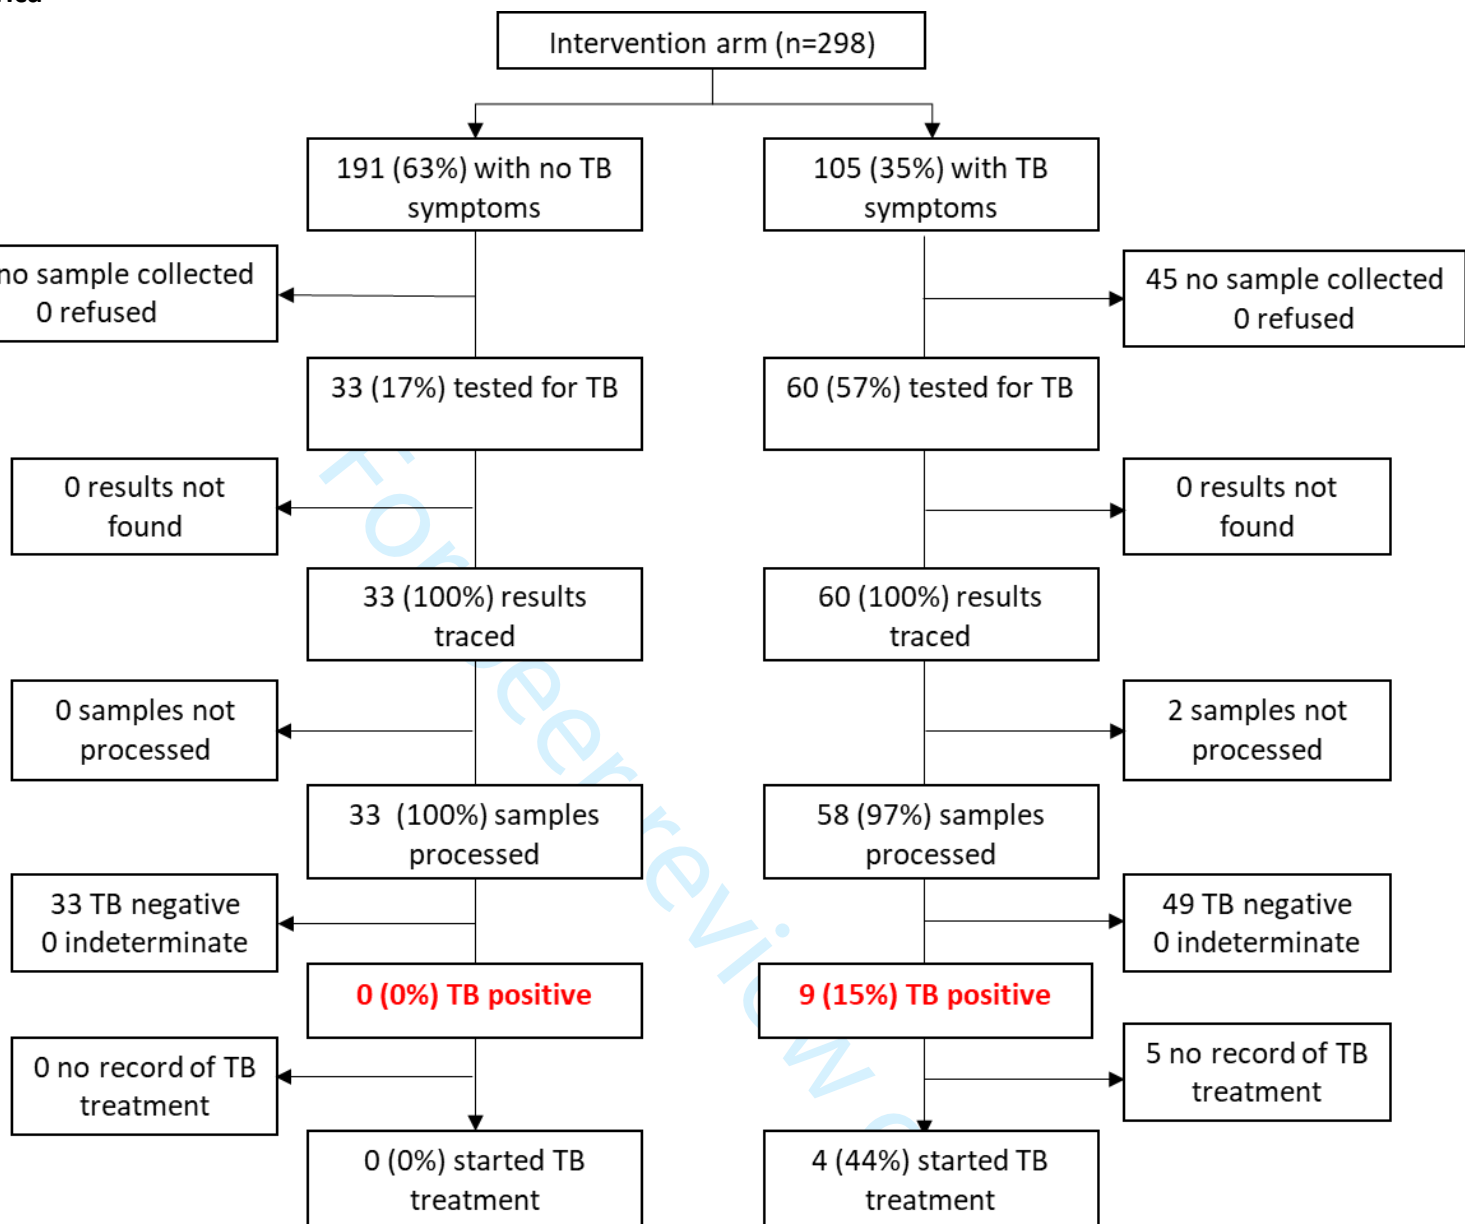

**Figure 3. TB testing flow chart at study enrollment among 296 SLATE II intervention arm participants South Africa**

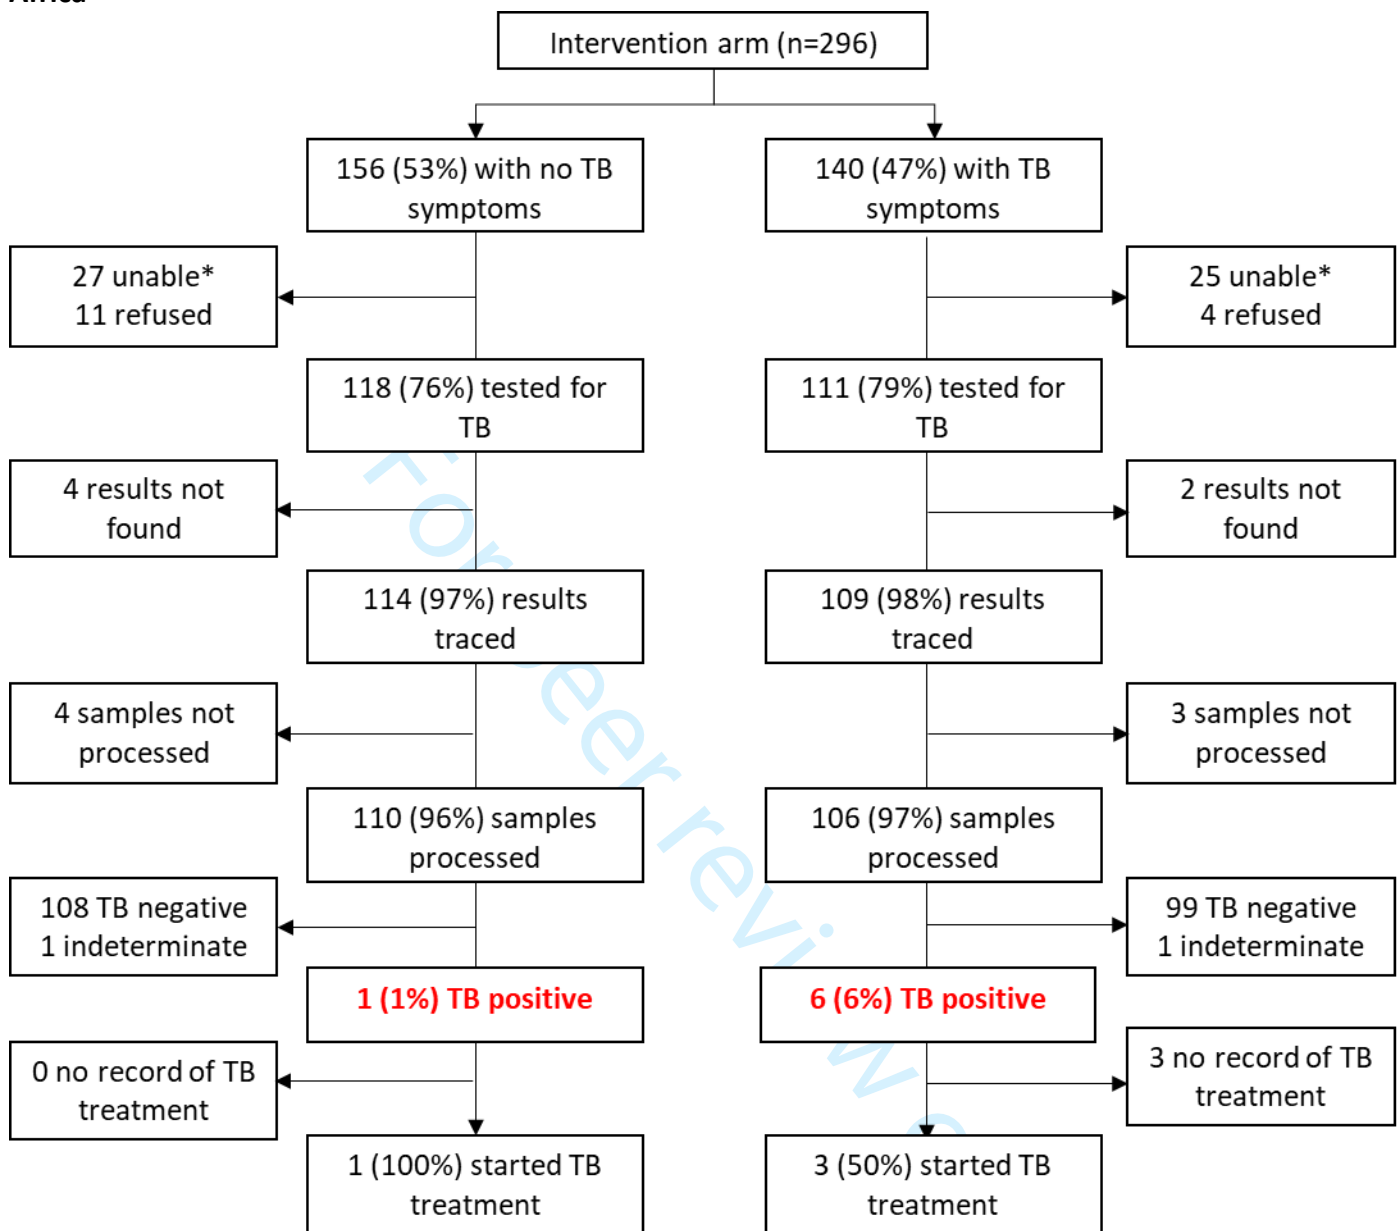

\*unable to collect a sputum sample from patient

**Figure 4. Sensitivity, specificity and positive predictive value (with 95% confidence intervals) for the WHO four symptom screen using SLATE II data.**

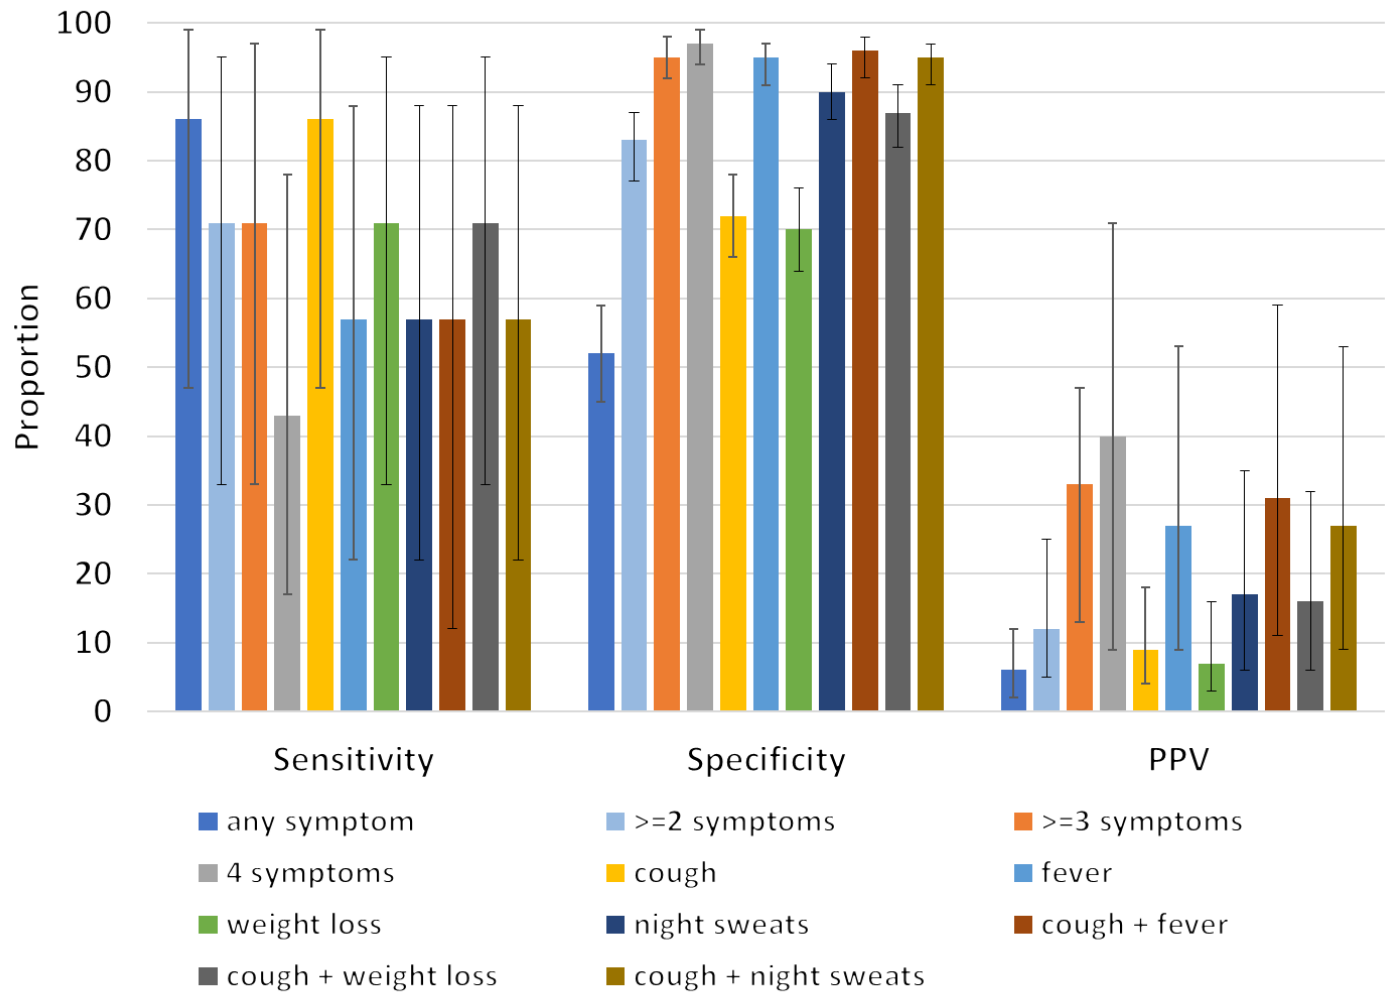

\*Negative predictive values are not shown as they remain consistent at above 98% for all analyses.

Only

Supplementary Fig 1. SLATE I algorithm to support same-day HIV treatment initiation [7]

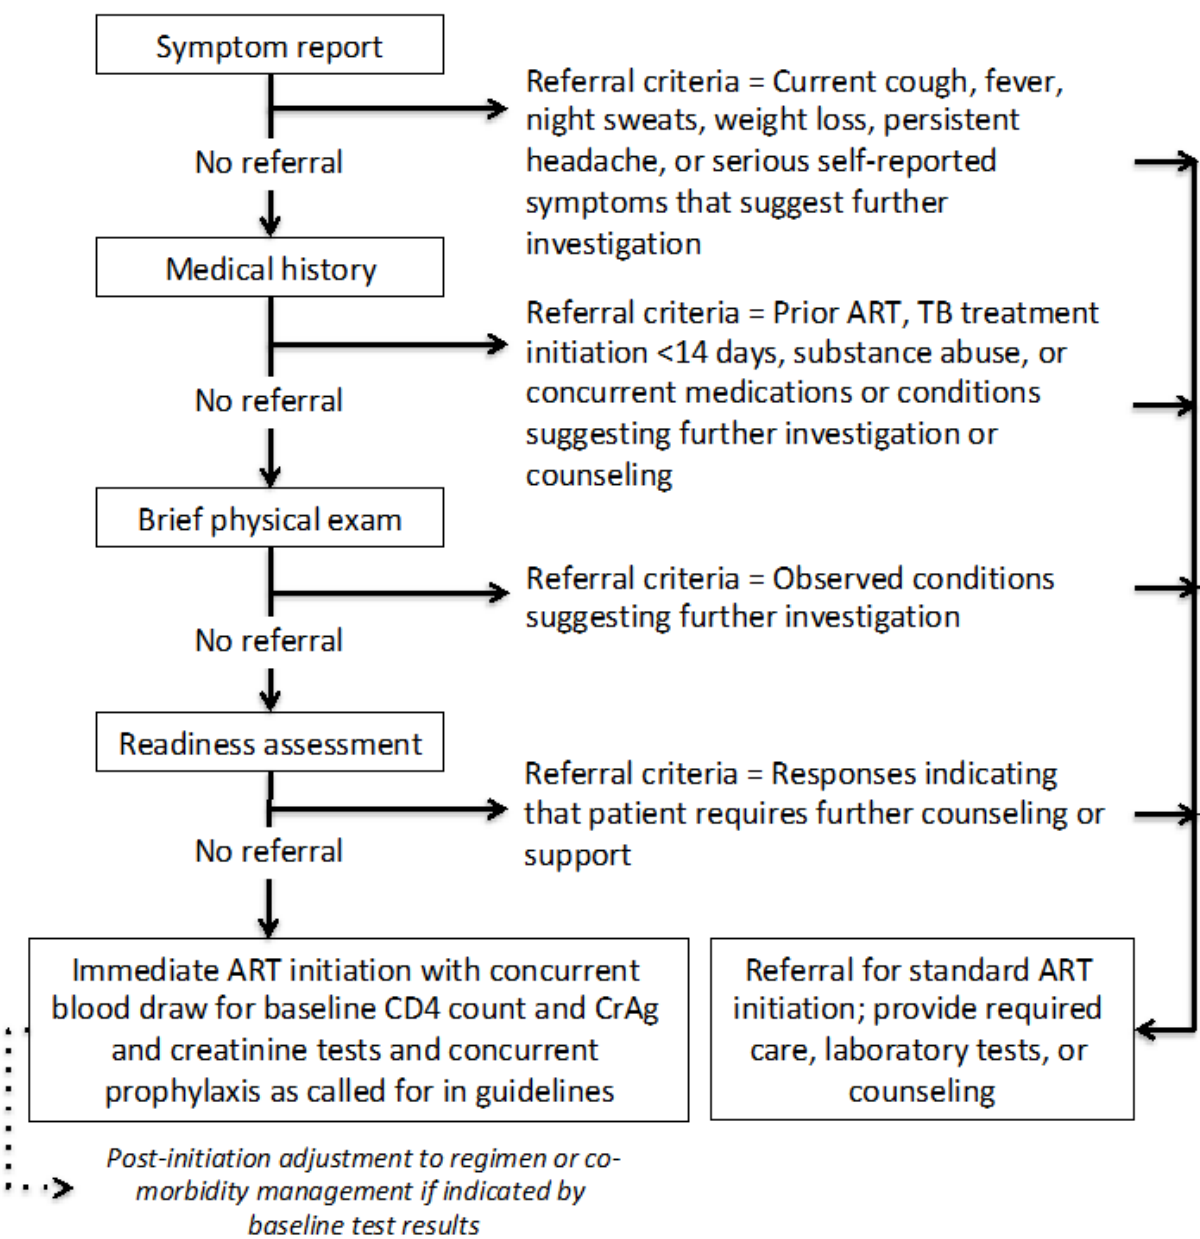

## Supplementary Fig 2. SLATE II algorithm to support same-day HIV treatment initiation [8]

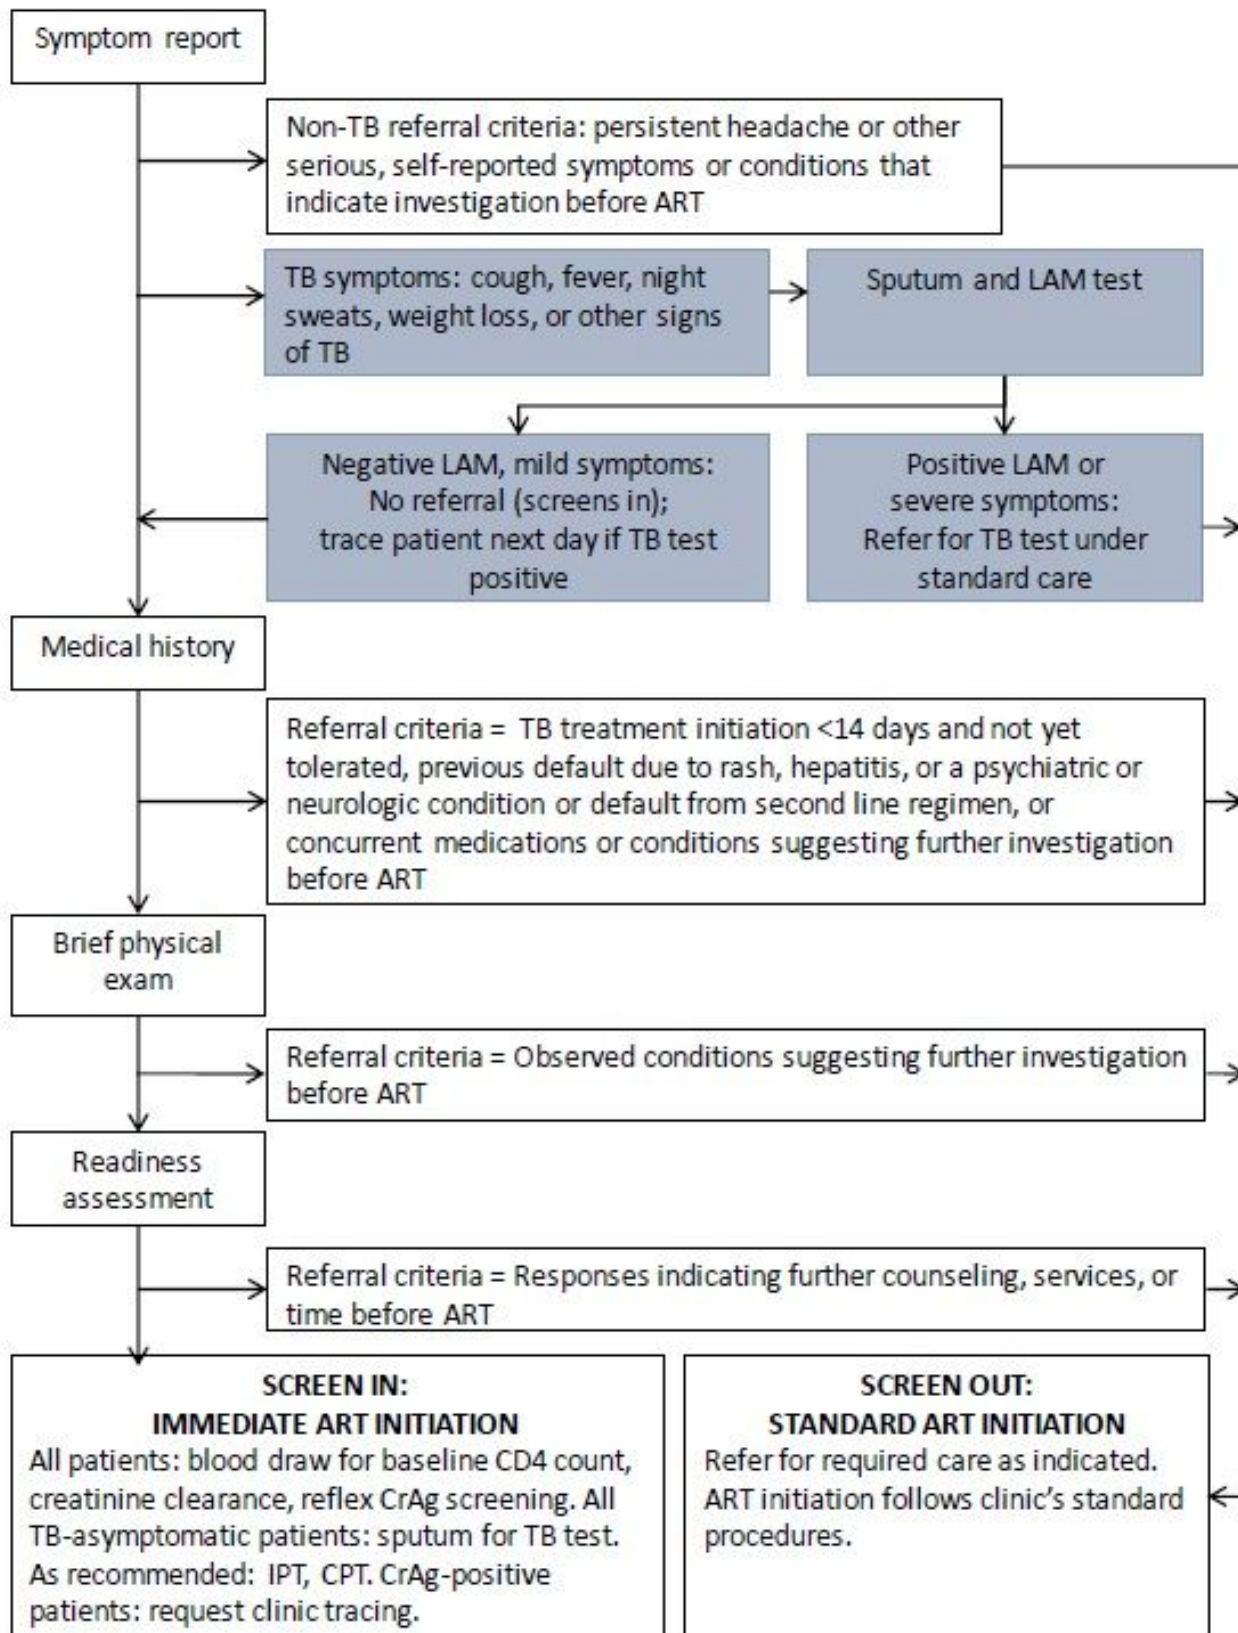

**Supplementary Table 1. Characteristics of patients at enrollment in Kenya and South Africa SLATE I and SLATE II trials**

| Variables†                                                       | Categories                      | Intervention arm                 | Intervention arm                       | Intervention arm                        |
|------------------------------------------------------------------|---------------------------------|----------------------------------|----------------------------------------|-----------------------------------------|
|                                                                  |                                 | Kenya (SLATE I)<br>(N = 240)     | South Africa<br>(SLATE I)<br>(N = 298) | South Africa<br>(SLATE II)<br>(N = 296) |
|                                                                  |                                 | n (%)                            | n (%)                                  | n (%)                                   |
| Period of enrollment                                             |                                 | July 13, 2017-<br>April 27, 2018 | March 6, 2017-<br>July 28, 2017        | March 14-<br>Sept 18, 2018              |
| Sex                                                              | Female                          | 142 (59)                         | 189 (63)                               | 189 (64)                                |
| Age                                                              | Median (IQR)                    | 36 (29, 44)                      | 34 (29, 41)                            | 35 (29, 41)                             |
| CD4 count at enrollment<br>(cells/mm <sup>3</sup> )              | Median (IQR)                    | 272 (124, 522)                   | 275 (132, 459)                         | 294 (135, 464)                          |
| Location of current<br>residence                                 | Town (urban)                    | 35 (15)                          | 18 (6)                                 | 31 (10)                                 |
|                                                                  | Peri-urban                      | 66 (28)                          | 299 (89)                               | 265 (90)                                |
|                                                                  | Rural home or village           | 139 (58)                         | 14 (5)                                 | 0 (0)                                   |
| Current house is primary<br>residence                            | Yes                             | 154 (64)                         | 141 (47)                               | 128 (43)                                |
| Number other persons in<br>house                                 | Median (IQR)                    | 3 (2, 5)                         | 2 (1, 3)                               | 1 (1, 3)                                |
| Usual activity when well                                         | Formal employment               | 18 (8)                           | 82 (28)                                | 69 (23)                                 |
|                                                                  | Informal sector work            | 161 (67)                         | 80 (27)                                | 70 (24)                                 |
|                                                                  | Unemployed, looking<br>for work | 12 (5)                           | 107 (36)                               | 138 (47)                                |
|                                                                  | Other                           | 9 (4)                            | 29 (10)                                | 12 (4)                                  |
| Transport mode to clinic<br>today (multiple choices<br>possible) | Minibus or taxi                 | 118 (49)                         | 122 (41)                               | 110 (37)                                |
|                                                                  | Walking                         | 46 (19)                          | 156 (53)                               | 161 (54)                                |
|                                                                  | Private car                     | 11 (5)                           | 19 (19)                                | 25 (8)                                  |
|                                                                  | Motorbike                       | 137 (57)                         | 0 (0)                                  | 0 (0)                                   |

**Supplementary Table 2. Median CD4 count (cells/mm<sup>3</sup>) for patients with and without TB symptoms and those with TB diagnosis in SLATE I and SLATE II trials**

| Variable                                                     | Median CD4 Count<br>Intervention arm<br>Kenya (SLATE I) |               | Median CD4 Count<br>Intervention arm<br>South Africa (SLATE I) |               | Median CD4 Count<br>Intervention arm<br>South Africa (SLATE II) |               |
|--------------------------------------------------------------|---------------------------------------------------------|---------------|----------------------------------------------------------------|---------------|-----------------------------------------------------------------|---------------|
|                                                              | n (%)                                                   | Median (IQR)  | n (%)                                                          | Median (IQR)  | n (%)                                                           | Median (IQR)  |
| <b>No TB symptoms</b>                                        | 148 (62)                                                | 357 (191-632) | 191 (63)                                                       | 307 (141-486) | 156 (53)                                                        | 405 (210-547) |
| <b>TB symptom positive</b>                                   | 90 (38)                                                 | 152 (64-329)  | 105 (37)                                                       | 245 (125-425) | 140 (47)                                                        | 175 (89-365)  |
| <b>TB symptom presence</b>                                   |                                                         |               |                                                                |               |                                                                 |               |
| Cough (current)                                              | 75 (83)                                                 | 144 (58-319)  | 71 (68)                                                        | 274 (132-433) | 76 (54)                                                         | 157 (68-416)  |
| Fever                                                        | 53 (59)                                                 | 136 (49-316)  | 45 (43)                                                        | 230 (78-368)  | 20 (14)                                                         | 110 (73-203)  |
| Night sweats                                                 | 56 (62)                                                 | 215 (56-388)  | 44 (42)                                                        | 229 (176-368) | 29 (21)                                                         | 135 (101-367) |
| Weight loss                                                  | 72 (80)                                                 | 146 (53-319)  | 76 (72)                                                        | 251 (133-433) | 96 (69)                                                         | 157 (68-337)  |
| <b>TB symptoms</b>                                           |                                                         |               |                                                                |               |                                                                 |               |
| 1 symptom                                                    | 13 (14)                                                 | 207 (147-317) | 36 (34)                                                        | 188 (72-295)  | 89 (64)                                                         | 250 (98-369)  |
| 2 symptoms                                                   | 18 (20)                                                 | 95 (64-232)   | 27 (26)                                                        | 373 (227-520) | 32 (23)                                                         | 137 (76-342)  |
| 3 symptoms                                                   | 29 (32)                                                 | 232 (72-406)  | 22 (21)                                                        | 216 (76-368)  | 8 (6)                                                           | 165 (63-350)  |
| 4 symptoms                                                   | 30 (33)                                                 | 116 (24-277)  | 20 (19)                                                        | 267 (180-423) | 11 (8)                                                          | 106 (68-157)  |
| <b>Symptom prevalence<br/>in those diagnosed<br/>with TB</b> |                                                         | <b>n=12</b>   |                                                                | <b>n=9</b>    |                                                                 | <b>n=7</b>    |
| Cough (current)                                              | 12 (100)                                                | 124 (12-150)  | 9 (100)                                                        | 251 (47-288)  | 6 (86)                                                          | 92 (60-107)   |
| Fever                                                        | 9 (75)                                                  | 114 (12-150)  | 7 (78)                                                         | 201 (18-339)  | 4 (57)                                                          | 92 (69-107)   |
| Night sweats                                                 | 12 (100)                                                | 142 (55-224)  | 7 (78)                                                         | 201 (18-288)  | 4 (57)                                                          | 69 (40-92)    |
| Weight loss                                                  | 10 (83)                                                 | 124 (12-150)  | 9 (100)                                                        | 251 (47-288)  | 5 (71)                                                          | 78 (60-106)   |

# BMJ Open

## Prevalence of TB symptoms, diagnosis and treatment among people living with HIV (PLHIV) not on ART presenting at outpatient clinics in South Africa and Kenya: baseline results from a clinical trial

|                                 |                                                                                                                                                                                                                                                                                                                                                                                                                                                                                                                                                                                                                                                                                                                                                                                                                                                                                                                                                                                                                                                                                                                                                                                                                                                                                                                                                                                                                                                                                                                                                                                                                                                                      |
|---------------------------------|----------------------------------------------------------------------------------------------------------------------------------------------------------------------------------------------------------------------------------------------------------------------------------------------------------------------------------------------------------------------------------------------------------------------------------------------------------------------------------------------------------------------------------------------------------------------------------------------------------------------------------------------------------------------------------------------------------------------------------------------------------------------------------------------------------------------------------------------------------------------------------------------------------------------------------------------------------------------------------------------------------------------------------------------------------------------------------------------------------------------------------------------------------------------------------------------------------------------------------------------------------------------------------------------------------------------------------------------------------------------------------------------------------------------------------------------------------------------------------------------------------------------------------------------------------------------------------------------------------------------------------------------------------------------|
| Journal:                        | <i>BMJ Open</i>                                                                                                                                                                                                                                                                                                                                                                                                                                                                                                                                                                                                                                                                                                                                                                                                                                                                                                                                                                                                                                                                                                                                                                                                                                                                                                                                                                                                                                                                                                                                                                                                                                                      |
| Manuscript ID                   | bmjopen-2019-035794.R1                                                                                                                                                                                                                                                                                                                                                                                                                                                                                                                                                                                                                                                                                                                                                                                                                                                                                                                                                                                                                                                                                                                                                                                                                                                                                                                                                                                                                                                                                                                                                                                                                                               |
| Article Type:                   | Original research                                                                                                                                                                                                                                                                                                                                                                                                                                                                                                                                                                                                                                                                                                                                                                                                                                                                                                                                                                                                                                                                                                                                                                                                                                                                                                                                                                                                                                                                                                                                                                                                                                                    |
| Date Submitted by the Author:   | 22-May-2020                                                                                                                                                                                                                                                                                                                                                                                                                                                                                                                                                                                                                                                                                                                                                                                                                                                                                                                                                                                                                                                                                                                                                                                                                                                                                                                                                                                                                                                                                                                                                                                                                                                          |
| Complete List of Authors:       | <p>Brennan, Alana; Boston University, Departments of Global Health &amp; Epidemiology; Health Economics and Epidemiology Research Office, Department of Internal Medicine, School of Clinical Medicine, Faculty of Health Sciences, University of the Witwatersrand</p> <p>Maskew, Mhairi; Health Economics and Epidemiology Research Office, Department of Internal Medicine, School of Clinical Medicine, Faculty of Health Sciences, University of the Witwatersrand</p> <p>Larson, Bruce; Boston University, Department of Global Health</p> <p>Tsikhutsu, Isaac; Kenya Medical Research Institute; Henry M. Jackson Foundation Medical Research International</p> <p>Bii, Margaret; Kenya Medical Research Institute; Henry M. Jackson Foundation Medical Research International</p> <p>Vezi, Lungisile; Health Economics and Epidemiology Research Office, Department of Internal Medicine, School of Clinical Medicine, Faculty of Health Sciences, University of the Witwatersrand</p> <p>Fox, Matthew; Boston University, Departments of Global Health &amp; Epidemiology; Health Economics and Epidemiology Research Office, Department of Internal Medicine, School of Clinical Medicine, Faculty of Health Sciences, University of the Witwatersrand</p> <p>Venter, Willem Daniel Francois; University of the Witwatersrand, Wits RHI</p> <p>Ehrenkranz, Peter; Bill and Melinda Gates Foundation</p> <p>Rosen, Sydney; Boston University, Department of Global Health; Health Economics and Epidemiology Research Office, Department of Internal Medicine, School of Clinical Medicine, Faculty of Health Sciences, University of the Witwatersrand</p> |
| <b>Primary Subject Heading</b>: | HIV/AIDS                                                                                                                                                                                                                                                                                                                                                                                                                                                                                                                                                                                                                                                                                                                                                                                                                                                                                                                                                                                                                                                                                                                                                                                                                                                                                                                                                                                                                                                                                                                                                                                                                                                             |
| Secondary Subject Heading:      | Epidemiology                                                                                                                                                                                                                                                                                                                                                                                                                                                                                                                                                                                                                                                                                                                                                                                                                                                                                                                                                                                                                                                                                                                                                                                                                                                                                                                                                                                                                                                                                                                                                                                                                                                         |
| Keywords:                       | Tuberculosis < INFECTIOUS DISEASES, HIV & AIDS < INFECTIOUS DISEASES, Clinical trials < THERAPEUTICS                                                                                                                                                                                                                                                                                                                                                                                                                                                                                                                                                                                                                                                                                                                                                                                                                                                                                                                                                                                                                                                                                                                                                                                                                                                                                                                                                                                                                                                                                                                                                                 |
|                                 |                                                                                                                                                                                                                                                                                                                                                                                                                                                                                                                                                                                                                                                                                                                                                                                                                                                                                                                                                                                                                                                                                                                                                                                                                                                                                                                                                                                                                                                                                                                                                                                                                                                                      |



1  
2  
3  
4  
5  
6  
7  
8  
9  
10  
11  
12  
13  
14  
15  
16  
17  
18  
19  
20  
21  
22  
23  
24  
25  
26  
27  
28  
29  
30  
31  
32  
33  
34  
35  
36  
37  
38  
39  
40  
41  
42  
43  
44  
45  
46  
47  
48  
49  
50  
51  
52  
53  
54  
55  
56  
57  
58  
59  
60

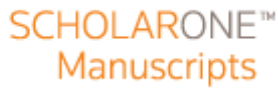

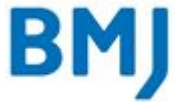

I, the Submitting Author has the right to grant and does grant on behalf of all authors of the Work (as defined in the below author licence), an exclusive licence and/or a non-exclusive licence for contributions from authors who are: i) UK Crown employees; ii) where BMJ has agreed a CC-BY licence shall apply, and/or iii) in accordance with the terms applicable for US Federal Government officers or employees acting as part of their official duties; on a worldwide, perpetual, irrevocable, royalty-free basis to BMJ Publishing Group Ltd ("BMJ") its licensees and where the relevant Journal is co-owned by BMJ to the co-owners of the Journal, to publish the Work in this journal and any other BMJ products and to exploit all rights, as set out in our [licence](#).

The Submitting Author accepts and understands that any supply made under these terms is made by BMJ to the Submitting Author unless you are acting as an employee on behalf of your employer or a postgraduate student of an affiliated institution which is paying any applicable article publishing charge ("APC") for Open Access articles. Where the Submitting Author wishes to make the Work available on an Open Access basis (and intends to pay the relevant APC), the terms of reuse of such Open Access shall be governed by a Creative Commons licence – details of these licences and which [Creative Commons](#) licence will apply to this Work are set out in our licence referred to above.

Other than as permitted in any relevant BMJ Author's Self Archiving Policies, I confirm this Work has not been accepted for publication elsewhere, is not being considered for publication elsewhere and does not duplicate material already published. I confirm all authors consent to publication of this Work and authorise the granting of this licence.

1  
2  
3 **Prevalence of TB symptoms, diagnosis and treatment among people living with HIV (PLHIV) not on**  
4 **ART presenting at outpatient clinics in South Africa and Kenya: baseline results from a clinical trial**  
5  
6

7 **Short title:** TB symptoms at ART initiation  
8

9 Alana T Brennan<sup>1,2,3\*</sup>, Mhairi Maskew<sup>3\*</sup>, Bruce A Larson<sup>1§\*</sup>, Isaac Tsikhutsu<sup>4,5</sup>, Margaret Bii<sup>4,5</sup>, Lungisile  
10 Vezi<sup>3</sup>, Matthew P Fox<sup>1,2,3</sup>, Willem DF Venter<sup>6</sup>, Peter Ehrenkranz<sup>7</sup>, Sydney Rosen<sup>1,3\*</sup>  
11  
12

- 13 1. Department of Global Health, Boston University School of Public Health, Boston, Massachusetts,  
14 United States of America
- 15 2. Department of Epidemiology, Boston University School of Public Health, Boston, Massachusetts,  
16 United States of America
- 17 3. Health Economics and Epidemiology Research Office, Department of Internal Medicine, School of  
18 Clinical Medicine, Faculty of Health Sciences, University of the Witwatersrand, Johannesburg, South  
19 Africa
- 20 4. Kenya Medical Research Institute, Kericho, Kenya
- 21 5. Henry M. Jackson Foundation Medical Research International, Inc., Nairobi, Kenya
- 22 6. Ezintsha, Wits Reproductive Health and HIV Institute, Department of Internal Medicine, School of  
23 Clinical Medicine, Faculty of Health Sciences, University of the Witwatersrand, Johannesburg, South  
24 Africa
- 25 7. Bill & Melinda Gates Foundation, Seattle, Washington, United States of America  
26  
27  
28  
29

30 \*Corresponding author: Alana Brennan, [abrennan@bu.edu](mailto:abrennan@bu.edu)  
31

32 Abstract word count: 299  
33

34 Manuscript word count: 4598  
35  
36  
37  
38  
39  
40  
41  
42  
43  
44  
45  
46  
47  
48  
49  
50  
51  
52  
53  
54  
55  
56  
57  
58  
59  
60

## Abstract

**Objective:** We used screening data and routine clinic records for intervention arm patients in the Simplified Algorithm for Treatment Eligibility (SLATE) trials to describe the prevalence of tuberculosis (TB) symptoms, diagnosis and treatment among people living with HIV (PLHIV), not on antiretroviral therapy (ART) and presenting at outpatient clinics in South Africa and Kenya. We compared the performance of the World Health Organization (WHO) four-symptom TB screening tool with a baseline Xpert® test.

**Setting:** Outpatient HIV clinics in South Africa and Kenya.

**Participants:** Eligible patients were non-pregnant, PLHIV,  $\geq 18$  years of age, not on ART, willing to provide written informed consent. A total 594 patients in South Africa and 240 in Kenya were eligible.

**Results:** Prevalence of any TB symptom was 38% in Kenya, and 35% (SLATE I) and 47% (SLATE II) in South Africa. During SLATE I, 70% of patients in Kenya and 57% in South Africa with  $\geq 1$  TB symptom were tested for TB. In SLATE II, 79% of patients with  $\geq 1$  TB symptom were tested. Of those, 19% tested positive for TB in Kenya, and 15% (SLATE I) and 5% (SLATE II) tested positive in South Africa. Of the 28 patients who tested positive in both trials, 20 initiated TB treatment. The lowest median CD4 counts were among those with active TB (Kenya 124cells/mm<sup>3</sup>; South Africa 193cells/mm<sup>3</sup>). When comparing the WHO four-symptom screening tool to the Xpert® test (SLATE II) we found that increasing the number of symptoms required for a positive screen from 1 to 3 or 4 decreased sensitivity but increased the positive predictive value to  $>30\%$ .

**Conclusions:** 80% of patients assessed for ART initiation presented with  $\geq 1$  TB symptoms. Reconsideration of the “any symptom” rule may be appropriate, with ART initiation among patients with fewer/milder symptoms commencing while TB test results are pending.

**Keywords:** Tuberculosis, HIV, Antiretroviral Therapy, Randomized trial, South Africa, Kenya

**Strengths and limitations of this study:**

- The data for the analysis presented here come from the intervention arms of two randomized clinical trials (SLATE I in South Africa and Kenya and SLATE II in South Africa), which were conducted at typical primary healthcare clinics in South Africa and typical hospital-based HIV clinics in Kenya.
- The studies enrolled adults not yet on ART, including those just diagnosed and those who had already received some pre-ART care, and collected data at study enrollment about TB symptoms, TB testing, and TB test results.
- We describe types and numbers of symptoms among those with and without TB and compare the performance of symptom screening to laboratory TB test results.
- Limitations of the analysis include heavy reliance on routinely collected data of TB tests performed and their results, likely leading to some missing and incomplete data, and the geographic clustering of the sites in each country, limiting geographic generalizability.

## INTRODUCTION

In 2017 the WHO began recommending rapid ART initiation, including same-day ART initiation (SDI), after the results of several studies indicated that it could reduce loss to follow-up in the pre-ART period[1-3]. The possibility of co-infection with TB, however, remains a major reason for delaying ART among those with the TB symptoms on the WHO four-symptom TB screen (cough, weight loss, fever, night sweats). This symptom screen has been shown to have good sensitivity (89%) but poor specificity (28%) in ART naïve PLHIV[4]. According to the WHO and national guidelines in both South Africa[5] and Kenya[6], patients who report  $\geq 1$  TB symptoms require further investigation for active TB disease before ART initiation, which entails a laboratory test such as Xpert<sup>®</sup> Mycobacterium TB complex /rifampin (MTB/RIF). Following the TB test, patients with negative results resume regular procedures for ART initiation, while those found to have TB are started on TB therapy, with ART initiation delayed until patients are regarded as stable on TB treatment. As a second clinic visit is typically required to receive TB test results, SDI may be impossible for patients presenting with TB symptoms.

The SLATE I study in South Africa and Kenya[7] and the SLATE II study in South Africa[8] evaluated a clinical algorithm to assess eligibility for rapid ART initiation in patients presenting for HIV care but not currently on ART. The algorithms distinguished between patients eligible for SDI of ART and patients requiring referral to clinic staff for additional standard of care evaluation and TB treatment before ART initiation. One or more symptoms of TB—cough, fever, weight loss or night sweats—of any duration or intensity were among the criteria for referral in SLATE I. SLATE II revised the SLATE I algorithm to allow patients with mild TB symptoms and a negative lipoarabinomannan assay (LAM) test[9] to initiate on the same day, based on clinician judgement.

The purpose of this analysis is to describe the prevalence of TB symptoms among patients presenting for HIV care but not currently on ART and to estimate rates of TB testing, diagnosis, and treatment using baseline screening data and routine clinic records for intervention arm patients in the SLATE I and II clinical trials in South Africa and Kenya. We also assessed the performance of the WHO four-

1  
2  
3 symptom TB screening tool compared to Xpert® MTB/RIF sputum testing. The implications of current  
4 TB screening, diagnosis, and treatment for implementation of SDI are discussed.  
5  
6  
7

## 8 **METHODS**

9

### 10 *SLATE trials*

11  
12 The SLATE I and SLATE II trials in South Africa and Kenya were multicenter trials evaluating two  
13 variations of a simplified algorithm to determine eligibility for SDI of ART without relying on laboratory  
14 results or multiple clinic visits[7, 8]. Enrollment for SLATE I (NCT02891135) was completed in July 2017  
15 in South Africa and April 2018 in Kenya. Enrollment for SLATE II (NCT03315013), only conducted in  
16 South Africa, was completed in September 2018.  
17  
18  
19  
20  
21  
22

### 23 *Study population*

24  
25 Patient inclusion and exclusion criteria for study eligibility have been described previously[7,8]. Briefly,  
26 those enrolled were non-pregnant, PLHIV,  $\geq 18$  years of age, not currently on ART and willing to provide  
27 written informed consent, who were randomized 1:1 to the intervention and standard of care arms.  
28 This analysis is limited to patients randomized to the intervention arm, for whom we have TB symptom  
29 data. Symptom screening of patients in the standard of care arm was poorly documented by clinic  
30 staff. Intervention arm patients were assessed for eligibility for SDI by a study nurse (South Africa) or  
31 clinical officer (Kenya) using the SLATE I or II algorithm, which each consisted of four screens: (1)  
32 current symptoms, (2) recent medical history, (3) physical conditions, and (4) treatment readiness (see  
33 Supplementary Figure 1 and Supplementary Figure 2). The baseline characteristics of these patients  
34 have previously been described[10].  
35  
36  
37  
38  
39  
40  
41  
42  
43  
44  
45

46 Approval of the SLATE trials was provided by the Human Research Ethics Committee of the University  
47 of the Witwatersrand in South Africa (SLATE I 160910; SLATE II 171011), the Kenya Medical Research  
48 Institute (SLATE I 3408) and the Walter Reed Army Institute of Research in Kenya (SLATE I 2401) , and  
49 the Institutional Review Board of Boston University (SLATE I H-35634; SLATE II H-37010).  
50  
51  
52  
53  
54

### 55 *Patient and Public Involvement*

56  
57  
58  
59  
60

1  
2  
3 Patients were not involved in the design, recruitment or conduct of the SLATE trials. We conducted a  
4 qualitative study at the end of SLATE II to help gain a deeper understanding of patient perceptions of  
5 initiating ART per standard of care compared to same-day initiation using the SLATE algorithm.  
6  
7 Presentation of primary study results will be conducted by study staff at participating clinics to  
8  
9 disseminate research findings to staff and patients prior to funding ending in July 2020.  
10  
11  
12  
13

#### 14 *TB screening and diagnosis differences between SLATE I and SLATE II*

15  
16 The main difference between the algorithm used in SLATE I and the revised version used in SLATE II  
17 was the approach to TB screening and diagnosis. Both algorithms asked patients for self-reported TB  
18 symptoms (any cough, fever, weight loss, or night sweats of any duration), based on the WHO four-  
19 symptom screen[11]. Procedures differed from that point forward, as described below and illustrated  
20  
21  
22  
23  
24  
25  
26 in supplementary figures 1 and 2.

27  
28 In SLATE I, consistent with national guidelines in both countries, patients reporting any symptoms of TB  
29 of any severity or duration were referred to routine clinic care, which should have included a TB test  
30 according to guidelines. Each patient was given a referral letter for the clinic indicating the reason for  
31 referral, such as the presence of TB symptoms, but no further effort was made by study staff to ensure  
32  
33  
34  
35  
36  
37 that the patient remained in care or was tested or treated for TB.

38  
39 As has previously been reported[12], in SLATE I and illustrated in Figures 1 and 2, a larger proportion of  
40 intervention arm patients than expected were ineligible for SDI due to TB symptoms (38% in Kenya and  
41 37% in South Africa). The presence of  $\geq 1$  more TB symptoms was by far the main reason for ineligibility  
42  
43  
44  
45  
46  
47  
48  
49  
50  
51  
52 under the SLATE I algorithm. Very few of these patients were ultimately confirmed to have TB,  
53 however, and study patients reported no TB-related adverse events after starting ART. We thus  
54 speculated that referring a patient out for mild TB symptoms, without further complications, was too  
55 stringent a requirement, and we developed the SLATE II algorithm accordingly.  
56  
57  
58

59  
60 In SLATE II, if a patient reported  $\geq 1$  TB symptoms, the newly developed TB module in the algorithm was  
applied. The TB module included: (1) a more detailed medical history (e.g. inquiring about severity and



1  
2  
3 duration of symptoms); (2) a focused physical examination to assess TB symptoms; (3) sputum  
4 collection for Xpert® MTB/RIF sputum testing; and (4) a point-of-care, urine-based LAM test  
5 (Determine TB LAM Ag, Abbott, Waltham, MA, USA)[9]. Patients with a positive LAM test, TB  
6 symptoms that were severe or of long duration, or any other clinical finding indicating active TB were  
7 referred back to routine care under the SLATE II algorithm. As with SLATE I, no effort was made by  
8 study staff to ensure that the patient underwent a TB test once referred back to routine care. A patient  
9 with a negative LAM test and without severe symptoms of TB remained eligible for same day initiation  
10 of ART. For SLATE II, unlike SLATE I, the study staff collected a sputum sample from all intervention arm  
11 patients who were able to produce one, regardless of TB symptoms. These samples were sent to the  
12 National Health Laboratory Service for Xpert® MTB/RIF sputum testing for TB disease.  
13  
14  
15  
16  
17  
18  
19  
20  
21  
22

### 23 *Data collection*

24  
25 We collected demographic and algorithm data for intervention arm patients via a case report form  
26 administered at study enrollment. Laboratory tests results (e.g., CD4 counts and Xpert® MTB/RIF  
27 findings) were extracted directly from laboratory electronic records or paper-based registers kept at  
28 each site, while follow-up data for the study period were collected from routinely generated clinical  
29 record data from patient records in electronic and paper format.  
30  
31  
32  
33  
34  
35

### 36 *Statistical analysis*

37  
38 Simple descriptive statistics were used to display demographic and clinical characteristics of patients at  
39 study enrollment, prevalence of TB symptoms, TB diagnosis and TB treatment.  
40  
41  
42

43 Having Xpert® MTB/RIF sputum tests on the majority (n=214) of SLATE II intervention arm patients  
44 provided a unique opportunity to assess the performance of the WHO four-symptom TB screening  
45 tool. We defined 11 possible interpretations of TB symptom screening results and compared them to  
46 the gold standard of Xpert® MTB/RIF: 1) any TB symptom; 2)  $\geq 2$  symptoms; 3)  $\geq 3$  TB symptoms; 4) all 4  
47 TB symptoms; 5) cough alone; 6) fever alone; 7) weight loss alone; 8) night sweats alone; 9) cough and  
48 fever; 10) cough and night sweats and 11) cough and weight loss. We calculated the sensitivity  
49 (probability of screening positive (using each definition above) when TB disease is present as defined  
50  
51  
52  
53  
54  
55  
56  
57  
58  
59  
60

1  
2  
3 by Xpert® MTB/RIF), specificity (probability of screening negative when TB disease is not present as  
4 defined by Xpert® MTB/RIF), positive predictive value (probability of a patient having TB disease when  
5 the screen is positive) and negative predictive value (the probability of a patient not having TB disease  
6 when the screen is negative).

## 11 RESULTS

### 15 *Demographic and clinical characteristics*

16  
17 Supplementary Table 1 summarizes basic characteristics of intervention arm patients stratified by trial  
18 cohort (N=240 for SLATE I Kenya; N=298 for SLATE I South Africa; N=296 for SLATE II). The majority of  
19 patients in each group were females in their mid-thirties, with a median baseline CD4 count between  
20 272 and 294 cells/mm<sup>3</sup>. We excluded 4 patients in Kenya and 1 in South Africa in the SLATE I trial who  
21 were known to be on TB treatment at study enrollment (Table 1). Further details of baseline  
22 characteristics of the cohorts have been reported previously[10].

### 30 *TB symptom prevalence*

31  
32 The prevalence of any TB symptoms was 38% [95% confidence interval:32-44%] in SLATE I in Kenya,  
33 35% [30-41%] in SLATE I in South Africa, and 47% [42-53%] in SLATE II (Table 1). In both studies and  
34 both countries, amongst people with any symptom, cough (66% combined) and weight loss (72%  
35 combined) were the most common symptoms reported. As presented in Supplementary Table 2,  
36 patients with TB symptoms had substantially lower CD4 counts in all three cohorts at study enrollment  
37 than did those with no symptoms of TB, indicating more advanced HIV disease among symptomatic  
38 patients. We saw little variation in CD4 count when the data were stratified by number of symptoms or  
39 symptom type. The lowest median CD4 counts were recorded among those found to have active TB  
40 disease (Kenya 124 cells/mm<sup>3</sup> [12-150]; South Africa (SLATE I and II combined) 193 cells/mm<sup>3</sup> [56-223].

### 50 *TB testing and diagnosis among symptomatic patients*

51  
52 In Kenya (SLATE I), 90 (38% [32-44%]) intervention arm patients had  $\geq 1$  symptom of TB and screened  
53 out of the algorithm, with referral back to standard care. Clinic staff chose or were able to test only  
54 63/90 (70% [60-79%]) symptomatic patients for TB. Of those tested, 12/63 (19% [11-30%]) had a

1  
2  
3 positive result, corresponding to an estimated TB prevalence in symptomatic patients presenting for  
4 care in Kenya of 5% [3-8%] (assuming those not tested were negative for TB disease) (Figure 1). In  
5 SLATE I in South Africa, we saw a similar proportion of patients presenting with at least 1 symptom of  
6 TB (105, 35% [30-41%]), but only 60 (57% [48-66%]) of these symptomatic patients were tested for TB  
7 by the study clinics. Of those tested, 9/60 (15% [8-26%]) had a positive result, corresponding to an  
8 estimated TB prevalence in patients presenting for care in South Africa during SLATE I of 3% [2-5%]  
9 (Figure 2), with the same assumption regarding the negative status of those not tested.  
10  
11  
12  
13  
14  
15  
16  
17

18 In SLATE II, all 296 intervention arm patients were asked for a sputum sample per the study  
19 protocol[8], regardless of symptoms. We were able to successfully collect and test sputum for 111  
20 (79% [72-85%]) symptomatic patients and 118 (76% [68-82%]) asymptomatic patients, or 72%  
21 (n=214/296) overall (Figure 3). Of the 29 symptomatic patients not tested, 25 were unable to produce  
22 a sputum sample and 4 refused to test. Among the 106 symptomatic patients in SLATE II with a  
23 successful test, 6 (5% [2-11%]) results were positive for TB, producing an estimated TB prevalence in all  
24 PLHIV (asymptomatic and symptomatic) presenting for care in South Africa during SLATE II of 2% [1-  
25 5%], with the same assumption regarding the negative status of those not tested.  
26  
27  
28  
29  
30  
31  
32  
33

34 Amongst the total of 28 TB-positive patients in both studies, 92% of patients in Kenya and 81% in South  
35 Africa (SLATE I and II combined) had at least three symptoms of the disease, and 67% in Kenya and 63%  
36 in South Africa had all four symptoms. Virtually all (96% [84-99%]) those diagnosed presented with a  
37 cough. Weight loss was also common (86% [69-95%]), followed by night sweats (82% [65-93%]) and  
38 fever (71% [53-86%]) (Table 1).  
39  
40  
41  
42  
43  
44

#### 45 *TB testing and diagnosis in asymptomatic patients*

46 Among the 337 (63% [58-67%]) patients with no TB symptoms in SLATE I, four (3% [1-6%]) patients in  
47 Kenya and 33 (17% [12-23%]) patients in South Africa were tested for TB by the study clinics. In Kenya,  
48 three of the patients had documented reasons for being tested by the clinic (one was taking cough  
49 syrup for the previous 5 days and was recently screened for TB, one had suspected extra-pulmonary TB  
50 due to swelling in the jaw, and one patient was asthmatic). The remaining patient had no documented  
51  
52  
53  
54  
55  
56  
57  
58  
59  
60

1  
2  
3 reason for a TB test. In South Africa, one of the clinics in our study was attempting to collect sputum  
4 from all PLHIV prior to ART initiation, regardless of symptoms. None of the 33 asymptomatic patients  
5 tested were positive (Figures 1 and 2).  
6  
7  
8  
9

10 In SLATE II, as per the study protocol[8], all 296 intervention arm patients were asked for a sputum  
11 sample. We were able to successfully collect and test sputum for 118 (76% [68-93%]) asymptomatic  
12 patients (Figure 3). One positive TB test result was recorded among those who were eligible for SDI  
13 under the SLATE II algorithm. This was an asymptomatic patient who had a negative LAM test and CD4  
14 count of 350 cells/mm<sup>3</sup>. The patient was successfully traced and commenced TB treatment the  
15 following day.  
16  
17  
18  
19  
20  
21  
22

### 23 *TB LAM test results*

24 In SLATE II, all intervention arm subjects with  $\geq 1$  symptoms of TB had a LAM test performed. Only two  
25 tests (<1%) were positive. Both patients had sputum samples taken for Xpert<sup>®</sup> testing. The first patient  
26 was a male who came to the clinic for care because he felt unwell. He reported all four TB symptoms  
27 and had a CD4 count of 78 cells/mm<sup>3</sup>. This patient's result came back positive for TB and he was  
28 successfully traced and commenced on TB treatment. The second patient was a female who came for  
29 an HIV test and reported cough and weight loss and had a CD4 count of 19 cells/mm<sup>3</sup>. This patient  
30 tested negative for TB on Xpert<sup>®</sup>.  
31  
32  
33  
34  
35  
36  
37  
38  
39

### 40 *TB treatment uptake*

41 In Kenya, eight of the 12 patients (67% [38-88%]) who tested positive for TB went on to initiate  
42 treatment for the disease, all within two weeks of diagnosis. Of the remaining four patients, one died  
43 within three weeks of study enrollment with no record of starting TB treatment, and the remaining  
44 three remained in care but had no record of initiating TB treatment. Of the 16 patients (symptomatic  
45 and asymptomatic) who tested positive in SLATE I and II in South Africa, eight initiated TB treatment  
46 after diagnosis (four patients within one week and four within seven weeks after study enrolment),  
47 four patients remained in care but had no record of starting TB treatment, three patients were  
48  
49  
50  
51  
52  
53  
54  
55  
56  
57  
58  
59  
60

1  
2  
3 transferred to another facility before starting TB treatment, and one patient was lost from care before  
4 starting treatment.  
5  
6  
7

### 8 *Unmasking TB disease*

9  
10 One of the major concerns about SDI is immune reconstitution inflammatory syndrome among  
11 patients with undiagnosed TB (TB-IRIS). No patients in either study (both standard of care and  
12 intervention arms) had indications in their routine clinic records of IRIS reactions during passive study  
13 follow up, though this may reflect incomplete record-keeping. Patient clinical records indicated that  
14 clinic staff investigated a total of 25 patients for TB more than 30 days after study enrollment. Of these,  
15 24 test results were available (we were unable to locate one test result in SLATE I in South Africa) and  
16 two were positive for TB disease (one positive patient was in the standard of care arm in South Africa  
17 (SLATE I) and one was in the intervention arm in Kenya (SLATE I) and not eligible for SDI). Among these  
18 24 patients with a follow-up TB test, 4 (17%) (three in SLATE I and one in SLATE II) were eligible for SDI  
19 via the SLATE algorithm, none of these patients had a positive TB test.  
20  
21  
22  
23  
24  
25  
26  
27  
28  
29

30  
31 In the rest of the results section, we will focus solely on SLATE II in South Africa, where the new TB  
32 module in the SLATE II algorithm was applied.  
33  
34  
35

### 36 *TB in symptomatic patients eligible for SDI under SLATE II algorithm*

37  
38 In the SLATE II study, patients with milder TB symptoms and a negative TB LAM test were eligible for  
39 SDI under the study at the discretion of the study nurse. Of the intervention arm patients who  
40 screened in and were eligible for SDI, 40% [34-46%] (n=101) presented with at least one of the four TB  
41 symptoms. Of these, 76% [66-83%] (n=77) reported only one symptom, 20% [13-28%] (n=20) reported  
42 two symptoms, and 4% [1-9%] (n=4) reported 3 or more symptoms. The most frequently reported  
43 symptoms were weight loss (64%) and cough (45%); night sweats (13%) and fever (6%) were less  
44 frequently reported. Of the 101 symptomatic patients, 75% [64-81%] (n=74) successfully completed a  
45 TB test (the remainder either could not produce a sputum sample or were unwilling to do so) and of  
46 these, only one tested positive for TB. This patient reported only cough and had a negative LAM test  
47 during administration of the SLATE II algorithm. After SDI, the patient, whose CD4 count was 116  
48  
49  
50  
51  
52  
53  
54  
55  
56  
57  
58  
59  
60

1  
2  
3 cells/mm<sup>3</sup>, could not be traced to start TB treatment, despite phone calls and a home visit. The patient  
4 never returned to the clinic after study enrolment for either TB or HIV care.  
5  
6  
7

### 8 *Sensitivity, specificity and predictive values of SLATE II algorithm*

9  
10 Figure 4 displays the results of the performance of the WHO four-symptom screen in SLATE II  
11 intervention arm patients. The sensitivity and specificity of any single TB symptom were 86% [47-99%]  
12 and 52% [45-59%], respectively. The positive predictive value was 6% [2-12%], while the negative  
13 predictive value was 99% [96-99%]. When modifying the definition of a positive TB screen to  $\geq 3$   
14 symptoms, sensitivity decreased to 71% [33-95%] and specificity increased to 95% [92-98%]. The  
15 positive predictive value improved to 33% [13-59%] while negative predictive value remained  
16 unchanged (99% [97-99%]). The WHO symptom screening tool appeared to perform the best for  
17 sensitivity (86% [47-99%]) and specificity (72% [66-78%]) when using cough only. However, the positive  
18 predictive value was the highest in the analysis using  $\geq 3$  (33% [13-59%]) and 4 (40% [14-71%])  
19 symptoms. In all other analyses of the WHO four-symptom screen, sensitivity falls, and specificity  
20 increases as a result, while the positive predictive value ranges from 7% to 31% depending on how the  
21 prevalence shifts. The negative predictive value remained unchanged for all analyses at above 98%.  
22 This was expected as the prevalence of TB in the population was low (3%) based on Xpert<sup>®</sup> testing.  
23  
24  
25  
26  
27  
28  
29  
30  
31  
32  
33  
34  
35  
36

## 37 **DISCUSSION**

38  
39  
40 In three cohorts of PLHIV not yet on ART and presenting for care in Kenya and South Africa since 2017,  
41 we estimated an overall prevalence of any TB symptoms of 35% to 50%. Between 60% and 80% of  
42 these patients were tested for TB, among whom 19% in Kenya and 6% to 15% in South Africa had a  
43 positive TB test using Xpert MTB/RIF, corresponding to an estimated prevalence in patients presenting  
44 for care of 5% in Kenya and 2% to 3% in South Africa (assuming those not tested are negative for TB  
45 disease). The results we report for TB symptom prevalence (with cough also being the most common  
46 symptom reported) and percentage of patients with TB symptoms tested for TB reported in our study  
47 are consistent with what has been previously published at a national level in Kenya[13] and in HIV  
48 study cohorts in South Africa[14-21]. The consistency of our estimates of TB disease prevalence with  
49  
50  
51  
52  
53  
54  
55  
56  
57  
58  
59  
60

1  
2  
3 previously published literature varied. Some studies report estimates that were comparable[13,14],  
4 lower[15], or higher[16-21]. National estimates of TB prevalence are still sparse in South Africa.  
5  
6 However, the National Tuberculosis Prevalence Survey is currently underway is currently underway in  
7  
8 South Africa, so better estimates will be available soon[22].  
9

10  
11  
12 In our studies, over 80% of the 28 patients who tested positive for TB disease reported having at least  
13  
14 three clinical symptoms of the disease, the most common being a cough, followed by weight loss, night  
15  
16 sweats, and fever. Other studies have estimated more than 80% of patients diagnosed with TB had  
17  
18 more than one symptom of the condition[18,19,23]. A study in South Africa also reported that more  
19  
20 than 60% of patients without TB disease had symptoms [23], again consistent with our findings of 59%.  
21

22  
23 Using SLATE II results, the performance of the WHO four-symptom screen tool, when classifying  
24  
25 patients with  $\geq 1$  symptoms of TB, was comparable regarding sensitivity to what was reported in a  
26  
27 recent meta-analysis[4], but we had a higher specificity at 52% (vs. 28%[4]). When we increased the  
28  
29 number of symptoms required for a positive screen to 3 or 4, or to just 4, we saw a decrease in  
30  
31 sensitivity and subsequent increase in specificity and an increase in the positive predictive value from  
32  
33 6% (for  $\geq 1$  symptoms of TB) to 33% and 40%, respectively.  
34

35  
36 When delaying ART in person living with HIV is contingent on a positive TB test, the positive predictive  
37  
38 value is more clinically relevant than sensitivity or specificity. The main reason for the delay of ART  
39  
40 initiation in TB suspect patients is to prevent TB-IRIS. The estimated risk of TB-IRIS is quite low,  
41  
42 however, at roughly 1% to 6% in sub-Saharan Africa[24]. This risk is highest in patients presenting with  
43  
44 CD4 counts  $< 100$  cells/mm<sup>3</sup>[25,26]. The median CD4 count in all three of our cohorts amongst  
45  
46 symptomatic patients was above 100 cells/mm<sup>3</sup>, while patients presenting with no symptoms had a  
47  
48 median CD4 count above 300 cells/mm<sup>3</sup>. The lowest median CD4 counts, and those at highest risk of  
49  
50 TB-IRIS, were amongst patients who had three if not all four symptoms of TB disease and had a positive  
51  
52 Xpert® test. In a healthcare system that can produce TB test results soon after ART initiation and  
53  
54 successfully contact (trace) patients with positive results, it may be reasonable to increase the number  
55  
56 of TB symptoms required to trigger a delay in ART initiation to 3 or 4. This would increase the  
57  
58

1  
2  
3 probability that a patient who is classified as TB positive (using the WHO four-symptom screen) truly  
4 has TB disease and allow patients with fewer or milder TB symptoms to start ART while TB test results  
5 are pending. It is still unknown whether initiating ART prior to TB being confirmed or treated causes  
6 harm (or benefit). In a setting in which TB tests are delayed and/or active tracing of patients with  
7 positive results is poor, in contrast, a more conservative approach—delaying ART until a TB test can be  
8 completed for patients with even one symptom—may continue to be justified. However, more  
9 research is required to accurately weigh the risks of delaying ART (which might prevent a person from  
10 being successfully linked into HIV treatment) versus the benefits of waiting for a definitive TB diagnosis  
11 to minimize the already low and potentially manageable clinical risk of TB-IRIS.  
12  
13  
14  
15  
16  
17  
18  
19  
20

21 In both Kenya and South Africa, national TB guidelines during the study stated that PLHIV self-reporting  
22 any TB-related symptoms should be tested with Xpert® MTB/RIF and treated if diagnosed with the  
23 disease. In SLATE I, we saw gaps in following national guidelines in both countries. Twenty-seven  
24 symptomatic, intervention arm patients in Kenya and 45 in South Africa were ineligible for SDI due to  
25 TB symptoms and were referred back to the clinic for further testing but were not tested for TB by the  
26 clinic staff. We assume that a certain number of patients refused or were unable to provide a sputum  
27 sample for testing, but for some, the nurse or clinical officer who saw the patient chose not to do a  
28 test. At one study site in South Africa we were told, informally, that staff only requested TB tests if two  
29 or more symptoms were present, while at one site in Kenya, a clinical officer would diagnose a  
30 respiratory infection before TB and require the patient to go through a course of antibiotics, advising  
31 the patient to return for a TB test only if symptoms persisted. Whether failure to follow guidelines  
32 precisely reflects reasonable use of clinical judgment, lack of available resources, or irresponsible non-  
33 compliance on the part of clinic staff is unclear, but it should be considered in efforts to improve  
34 treatment of TB disease and maximize opportunities to offer TB preventative treatment for patients  
35 without TB.  
36  
37  
38  
39  
40  
41  
42  
43  
44  
45  
46  
47  
48  
49  
50

51 The urine TB-LAM test used in SLATE II (the Determine TB LAM Ag, as specified above) was positive in  
52 <1% of our intervention arm patients in the SLATE II trial. This test has been shown to improve TB  
53 diagnosis in patients with low CD4 counts[27], so the low yield we saw could be due to higher CD4  
54  
55  
56  
57  
58  
59  
60



1  
2  
3 counts in our cohort. The average CD4 count in SLATE II intervention arm patients was 294 cells/mm<sup>3</sup>,  
4 it was 175 cells/mm<sup>3</sup> amongst those with TB symptoms and ranged from 60-107 cells/mm<sup>3</sup> amongst  
5 those diagnosed with TB. Also, previous studies have shown that the positive predictive value of urine  
6 LAM testing depends upon the prevalence of TB disease in the population, which was low (6%) in our  
7 SLATE II cohort[28]. The LAM test used in the study may thus not offer much benefit for the cost  
8 involved.  
9  
10  
11  
12  
13  
14  
15

16 Our study had several limitations. First, while the study sites were all typical primary healthcare clinics  
17 in South Africa and typical hospital-based HIV clinics in Kenya, they were geographically clustered in  
18 each country, making generalizability to the rest of the country uncertain. Second, we relied heavily on  
19 routinely collected data pertaining to TB test conduct and results, and it is likely that some TB tests  
20 were ordered but not analyzed or analyzed but not recorded. Similarly, data on events after the study  
21 enrollment visit, such as post-initiation TB diagnoses or disease, were likely incomplete, and some  
22 events may not have been reported to healthcare facilities at all. Third, we assumed that patients who  
23 did not have TB tests were TB-negative; it is possible that some in fact had TB, making prevalence in  
24 our population higher than reported. Finally, our sample sizes were small, limiting our ability to stratify  
25 by patient characteristics; a larger sample might identify other characteristics associated with a  
26 positive TB test. The small sample size could also affect our ability to detect TB-related adverse events  
27 in our sample.  
28  
29  
30  
31  
32  
33  
34  
35  
36  
37  
38  
39

40 Despite these limitations, we conclude that in the SLATE I and SLATE II trials, among 235 patients with  
41 WHO-defined TB symptoms who were not eligible for SDI, over 80% did not have TB, making any delay  
42 to ART initiation due to the requirement for a pre-initiation TB test unnecessary. No serious, TB-related  
43 adverse events were reported after starting ART among symptomatic patients with or without delay in  
44 our study. Reconsideration of WHO's guidance to even "briefly" delay ART initiation based on presence  
45 of "any TB symptom" may be appropriate, with ART initiation among patients with fewer or milder  
46 symptoms commencing while TB test results are still pending.  
47  
48  
49  
50  
51  
52  
53

#### 54 **Acknowledgments**

55  
56  
57  
58  
59  
60

1  
2  
3 We thank the patients who participated in the study and the staff of the six study clinics for their  
4 cooperation; the City of Johannesburg and Ekurhuleni Metro in South Africa and the management of  
5 Kericho County Referral Hospital, Kapsabet County Referral Hospital, and Kombewa County Hospital in  
6 Kenya for permission to conduct this study.  
7  
8  
9

10  
11  
12 **Contributors:** MF, WV and SR had substantial contributions to the conception and design of the work.  
13 AB, MM and BL acquisition, analysis or interpretation of data. AB, MM, BL, IT, MB, LV, MF, WV, PE and  
14 SR contributed substantially to the drafting and revising the work critically for important intellectual  
15 content. All the authors have read and approved the final version of the manuscript. All authors are  
16 willing to be accountable for the work and in ensuring that questions related to the accuracy and  
17 integrity of the work were appropriately investigated and resolved.  
18  
19  
20  
21  
22

23  
24  
25 **Competing interests:** None declared.  
26  
27

28  
29 **Funding:** Research was funded by the Bill and Melinda Gates Foundation (Grant No. OPP1136158)  
30  
31

32 **Data sharing statement:** Data generated by the study will be made publicly available in the Dryad  
33 repository (<http://www.datadryad.org/>) after the protocol has been closed (anticipated closure July  
34 2020). Until then, data will remain under the supervision of the Boston University Medical Campus IRB,  
35 the University of the Witwatersrand Human Research Ethics Committee (HREC), and the KEMRI  
36 Scientific and Ethics Research Unit. Requests can be sent to the BUMC IRB at [medirb@bu.edu](mailto:medirb@bu.edu). Data  
37 extracted from routine medical records are owned by the study sites, the South African National  
38 Department of Health, and the Kenyan Ministry of Health and cannot be made publicly available by the  
39 authors.  
40  
41  
42  
43  
44  
45  
46  
47  
48  
49  
50  
51  
52  
53  
54  
55  
56  
57  
58  
59  
60

## References

1. Guidelines for Managing Advanced HIV Disease and Rapid Initiation of Antiretroviral Therapy. Geneva: World Health Organization; 2017.
2. Amanyire G, Semitala FC, Namusobya J, Katuramu R, Kampiire L, Wallenta J et al. Effects of a multicomponent intervention to streamline initiation of antiretroviral therapy in Africa: a stepped-wedge cluster-randomised trial. *Lancet HIV*. 2016;3:e539–48.
3. Rosen S, Maskew M, Fox MP, Nyoni C, Mongwenyana C, Maletle G et al. Initiating antiretroviral therapy for HIV at a patient's first clinic visit: the RapIT Randomized Controlled Trial. *PLoS Med*. 2016;13:e1002015.
4. Hamada Y, Lujan J, Schenkel K, Ford N, Getahun H. Sensitivity and specificity of WHO's recommended four-symptom screening rule for tuberculosis in people living with HIV: a systematic review and meta-analysis. *Lancet HIV*. 2018 Sep;5(9):e515-e523.
5. National Department of Health. Same-day antiretroviral therapy (ART) initiation for HIV positive patients. Pretoria: National Department of Health; 2017.
6. Ministry of Health and National AIDS and STI Control Program (NASCOP). Guidelines on the Use of Antiretroviral Drugs for Treating and Preventing HIV Infection in Kenya 2018 Edition. Nairobi, Kenya; 2018.
7. Rosen S, Fox MP, Larson BA, Brennan AT, Maskew M, Tsikhutsu I, Bii M, Ehrenkranz PD, Venter WF. Simplified clinical algorithm for identifying patients eligible for immediate initiation of antiretroviral therapy for HIV (SLATE): protocol for a randomised evaluation. *BMJ Open*. 2017 May 28;7(5):e016340.
8. Rosen S, Maskew M, Brennan AT, Fox MP, Vezi L, Ehrenkranz PD, Venter WDF. Improved simplified clinical algorithm for identifying patients eligible for immediate initiation of antiretroviral therapy for HIV (SLATE II): protocol for a randomized evaluation. *Trials*. 2018 Oct 11;19(1):548.
9. World Health Organization. The use of lateral flow urine lipoarabinomannan assay (LF-LAM) for the diagnosis and screening of active tuberculosis in people living with HIV TB. Geneva: World Health Organization, 2015.
10. Brennan A, Maskew M, Larson B, Tsikhutsu I, Bii M, Vezi L, Fox M, Venter F, Ehrenkranz P, Rosen S. Who is seeking antiretroviral treatment for HIV now? Characteristics of patients presenting in Kenya and South Africa in 2017-2018. *J Int AIDS Soc*; in press.
11. World Health Organization. Systematic screening for active tuberculosis Principles and recommendations. Geneva: World Health Organization, 2013.
12. Maskew M, Larson B, Brennan AT, Fox MP, Vezi L, Tsikhutsu I, Bii M, Venter WDF, Rosen S. Same-day ART initiation without laboratory tests is safe and effective: primary outcomes of the SLATE trial in South Africa and Kenya. *PLoS Medicine*. 2019.
13. Kenya Tuberculosis Prevalence Survey. Republic of Kenya. Ministry of Health. 2016. Available at: <https://www.chskenya.org/wp-content/uploads/2018/04/Final-TB-Prevalence-Survey-Report.pdf>.
14. Rangaka MX, Wilkinson RJ, Glynn JR, Boulle A, van Cutsem G, Goliath R, et al. Effect of antiretroviral therapy on the diagnostic accuracy of symptom screening for intensified tuberculosis case finding in a south African HIV clinic. *Clin Infect Dis*. 2012;55(12):1698–706.

15. Hanrahan CF, Nonyane BAS, Mmolawa L, West NS, Siwelana T, Lebina L, Martinson N, Dowdy DW. Contact tracing versus facility-based screening for active TB case finding in rural South Africa: A pragmatic cluster-randomized trial (Kharitode TB). *PLoS Med*. 2019 Apr 30;16(4):e1002796.
16. Bajema KL, Bassett IV, Coleman SM, Ross D, Freedberg KA, Wald A, Drain PK. Subclinical tuberculosis among adults with HIV clinical features and outcomes in a South African cohort. *BMC Infect Dis*. 2019 Jan 5;19(1):14. doi: 10.1186/s12879-018-3614-7. PubMed PMID: 30611192; PubMed Central PMCID: PMC6321698.
17. Bassett IV, Wang B, Chetty S, Giddy J, Losina E, Mazibuko M, et al. Intensive tuberculosis screening for HIV-infected patients starting antiretroviral therapy in Durban. *South Africa Clin Infect Dis*. 2010;51(7):823–9.
18. Kerkhoff AD, Wood R, Lowe DM, Vogt M, Lawn SD. Blood neutrophil counts in HIV-infected patients with pulmonary tuberculosis: association with sputum mycobacterial load. *PLoS One*. 2013;8(7):e67956.
19. Ahmad Khan F, Verkuil S, Parrish A, Chikwava F, Ntuny R, El-Sadr W, et al. Performance of symptom-based tuberculosis screening among people living with HIV: not as great as hoped. *AIDS*. 2014;28(10):1463–72.
20. Lawn SD, Brooks SV, Kranzer K, Nicol MP, Whitelaw A, Vogt M, et al. Screening for HIV-associated tuberculosis and rifampicin resistance before antiretroviral therapy using the Xpert MTB/RIF assay: a prospective study. *PLoS Med*. 2011;8(7):e1001067.
21. Kranzer K, Houben RM, Glynn JR, Bekker LG, Wood R, Lawn SD. Yield of HIV-associated tuberculosis during intensified case finding in resource-limited settings: a systematic review and meta-analysis. *Lancet Infect Dis*. 2010 Feb;10(2):93-102.
22. Human Sciences Research Council (HSRC). National Tuberculosis Prevalence Survey underway. February 2018. Available at: <http://www.hsrc.ac.za/en/media-briefs/saph/national-tb-prevalance-survey-underway>
23. Swindells S, Komarow L, Tripathy S, Cain KP, MacGregor RR, Achkar JM, et al. Screening for pulmonary tuberculosis in HIV-infected individuals: AIDS Clinical Trials Group protocol A5253. *Int J Tuberc Lung Dis*. 2013;17(4):532–9.
24. Walker NF, Stek C, Wasserman S, Wilkinson RJ, Meintjes G. The tuberculosis-associated immune reconstitution inflammatory syndrome: recent advances in clinical and pathogenesis research. *Curr Opin HIV AIDS*. 2018 Nov;13(6):512-521.
25. Manabe YC, Campbell JD, Sydnor E, Moore RD. Immune reconstitution inflammatory syndrome: risk factors and treatment implications. *J Acquir Immune Defic Syndr*. 2007 Dec 1;46(4):456-62.
26. Cain KP, McCarthy KD, Heilig CM, Monkongdee P, Tasaneeyapan T, Kanara N, et al. An algorithm for tuberculosis screening and diagnosis in people with HIV. *N Engl J Med*. 2010 Feb 25;362(8):707-16.
27. Huerga H et al. Diagnostic value of the urine lipoarabinomannan assay in HIV-positive, ambulatory patients with CD4 below 200 cells/ $\mu$ l in 2 low-resource settings: a prospective observational study. *PLoS Medicine* 16(4): e1002792, 2019.

- 1  
2  
3 28. Drain PK, Gounder L, Sahid F, Moosa MY. Rapid Urine LAM Testing Improves Diagnosis of  
4 Expectorated Smear-Negative Pulmonary Tuberculosis in an HIV-endemic Region. Sci Rep. 2016 Feb  
5 11;6:19992.  
6  
7  
8  
9  
10  
11  
12  
13  
14  
15  
16  
17  
18  
19  
20  
21  
22  
23  
24  
25  
26  
27  
28  
29  
30  
31  
32  
33  
34  
35  
36  
37  
38  
39  
40  
41  
42  
43  
44  
45  
46  
47  
48  
49  
50  
51  
52  
53  
54  
55  
56  
57  
58  
59  
60

For peer review only

1  
2  
3 Figure 1. TB testing flow chart at study enrollment among 240 SLATE I intervention arm participants  
4 Kenya  
5

6  
7 Figure 2. TB testing flow chart at study enrollment among 298 SLATE I intervention arm participants  
8 South Africa  
9

10  
11 Figure 3. TB testing flow chart at study enrollment among 296 SLATE II intervention arm participants  
12 South Africa  
13

14  
15 Figure 4. Sensitivity, specificity and positive predictive value (with 95% confidence intervals) for the  
16 WHO four symptom screen using SLATE II data.  
17

18 Supplemental Fig 1. SLATE I algorithm to support same-day HIV treatment initiation [7].  
19

20 Supplementary Fig 2. SLATE II algorithm to support same-day HIV treatment initiation [8].  
21  
22  
23  
24  
25  
26  
27  
28  
29  
30  
31  
32  
33  
34  
35  
36  
37  
38  
39  
40  
41  
42  
43  
44  
45  
46  
47  
48  
49  
50  
51  
52  
53  
54  
55  
56  
57  
58  
59  
60

**Table 1. Self-reported TB symptoms, TB diagnosis, and TB treatment uptake among patients who screened out due to TB symptoms in the intervention arms of the SLATE I and SLATE II trials**

| Variable (% responding yes)                                       | Kenya                  | South Africa           | South Africa            |
|-------------------------------------------------------------------|------------------------|------------------------|-------------------------|
|                                                                   | (SLATE I)<br>(N = 240) | (SLATE I)<br>(N = 298) | (SLATE II)<br>(N = 296) |
|                                                                   | n (%)                  | n (%)                  | n (%)                   |
| <b>Screened for TB</b>                                            | 240 (100)              | 298 (100)              | 296 (100)               |
| <b>Currently on TB treatment*</b>                                 | 4 (2)                  | 2 (1)                  | 0 (0)                   |
| <b>1 or more TB symptoms</b>                                      | 90 (38)                | 105 (35)               | 140 (47)                |
| <b>Symptoms reported (among patients with 1 or more symptoms)</b> |                        |                        |                         |
| Cough (current)                                                   | 75 (83)                | 71 (68)                | 76 (54)                 |
| Fever                                                             | 53 (59)                | 45 (43)                | 20 (14)                 |
| Night sweats                                                      | 56 (62)                | 44 (42)                | 29 (21)                 |
| Weight loss                                                       | 72 (80)                | 76 (72)                | 96 (69)                 |
| <b>Number of symptoms reported (n)</b>                            |                        |                        |                         |
| 1 symptom                                                         | 13 (14)                | 36 (34)                | 89 (64)                 |
| 2 symptoms                                                        | 18 (20)                | 27 (26)                | 32 (23)                 |
| 3 symptoms                                                        | 29 (32)                | 22 (21)                | 8 (6)                   |
| 4 symptoms                                                        | 30 (33)                | 20 (19)                | 11 (8)                  |
| <b>TB test performed in symptomatic patients</b>                  |                        |                        |                         |
| <b>Positive TB tests among symptomatic patients</b>               | 12 (13)                | 9 (9)                  | 6 (5)                   |
| <b>Symptoms among those testing positive</b>                      |                        |                        |                         |
| Cough (current)                                                   | 12 (100)               | 9 (100)                | 6 (86)                  |
| Fever                                                             | 9 (75)                 | 7 (78)                 | 4 (57)                  |
| Night sweats                                                      | 12 (100)               | 7 (78)                 | 4 (57)                  |
| Weight loss                                                       | 10 (83)                | 9 (100)                | 5 (71)                  |

\*Excluded from analyses

Figure 1. TB testing flow chart at study enrollment among 240 SLATE I intervention arm participants Kenya

1  
2  
3  
4  
5  
6  
7  
8  
9  
10  
11  
12  
13  
14  
15  
16  
17  
18  
19  
20  
21  
22  
23  
24  
25  
26  
27  
28  
29  
30  
31  
32  
33  
34  
35  
36  
37  
38  
39  
40  
41  
42  
43  
44  
45  
46  
47  
48  
49  
50  
51  
52  
53  
54  
55  
56  
57  
58  
59  
60





**Figure 2. TB testing flow chart at study enrollment among 298 SLATE I intervention arm participants South Africa**

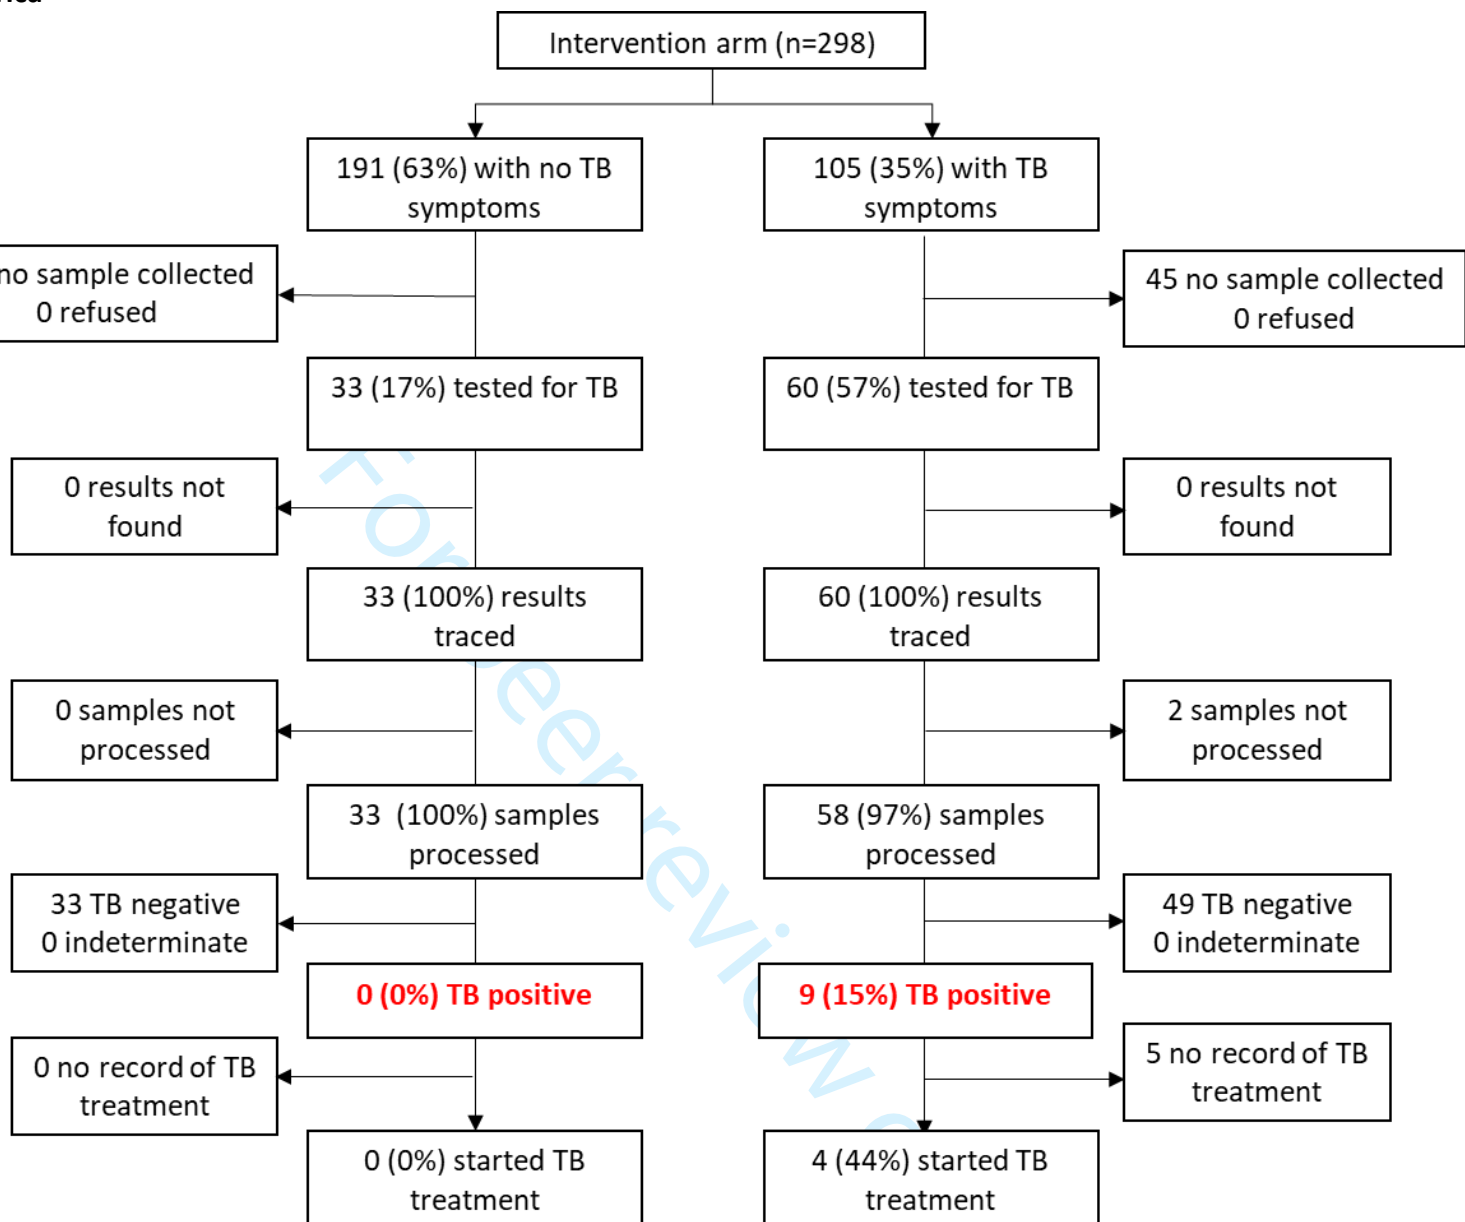

**Figure 3. TB testing flow chart at study enrollment among 296 SLATE II intervention arm participants South Africa**

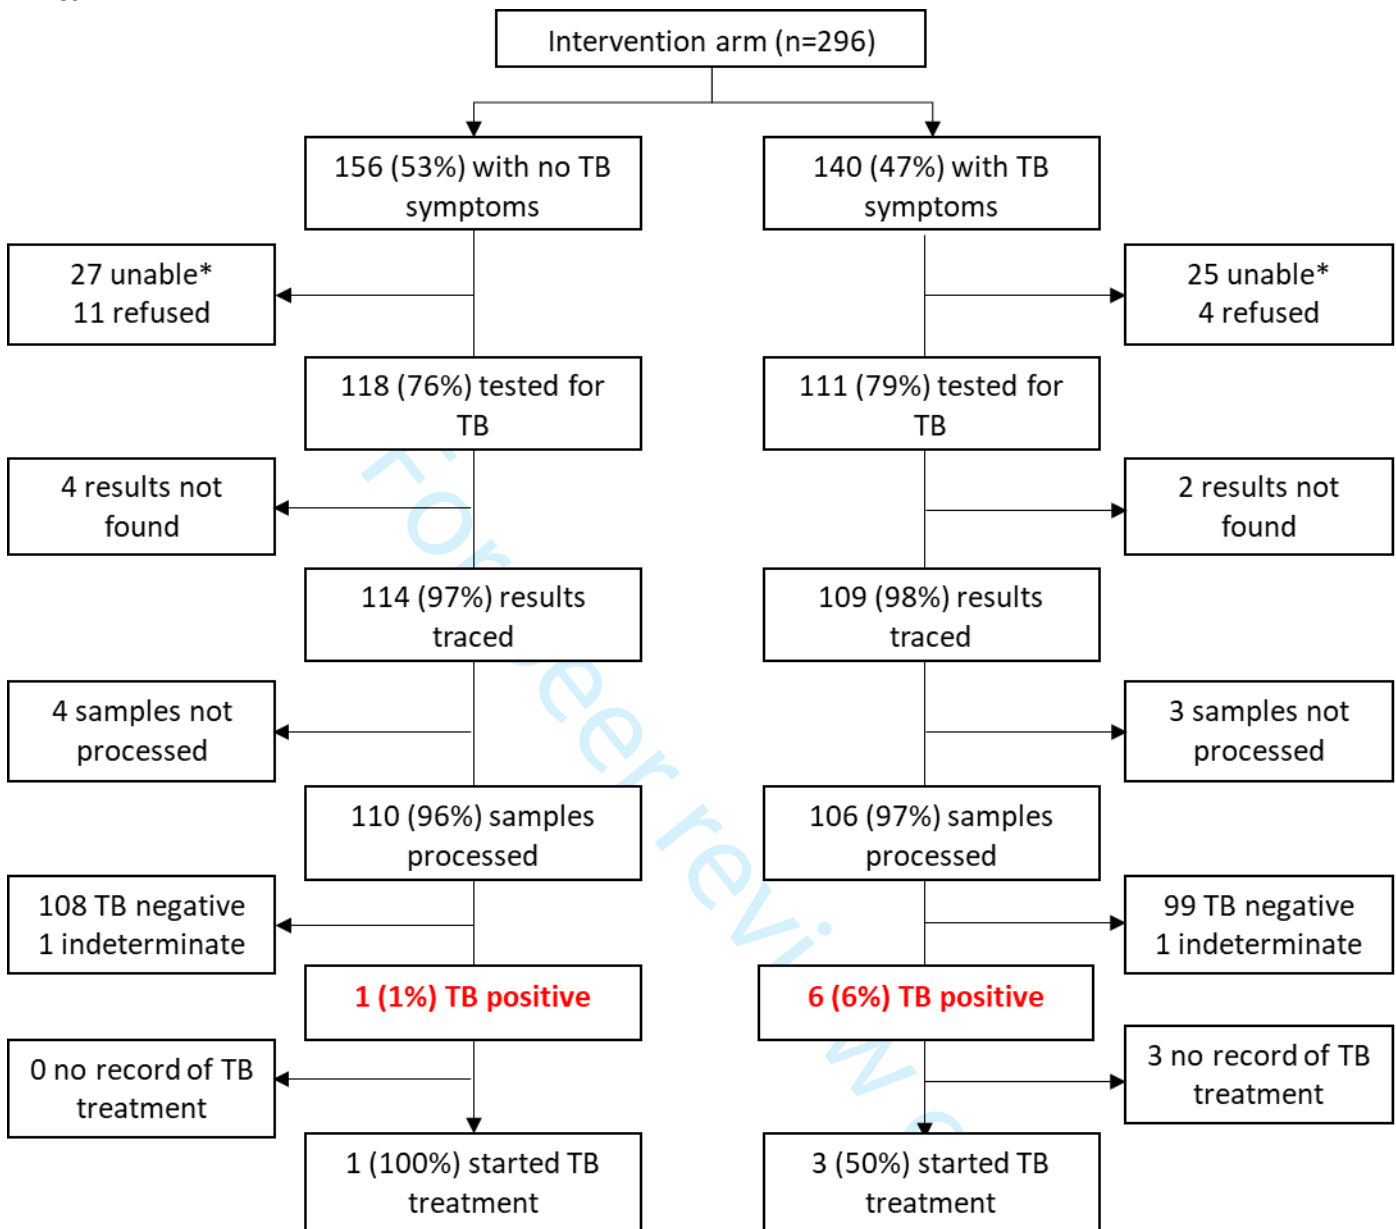

\*unable to collect a sputum sample from patient

**Figure 4. Sensitivity, specificity and positive predictive value (with 95% confidence intervals) for the WHO four symptom screen using SLATE II data.**

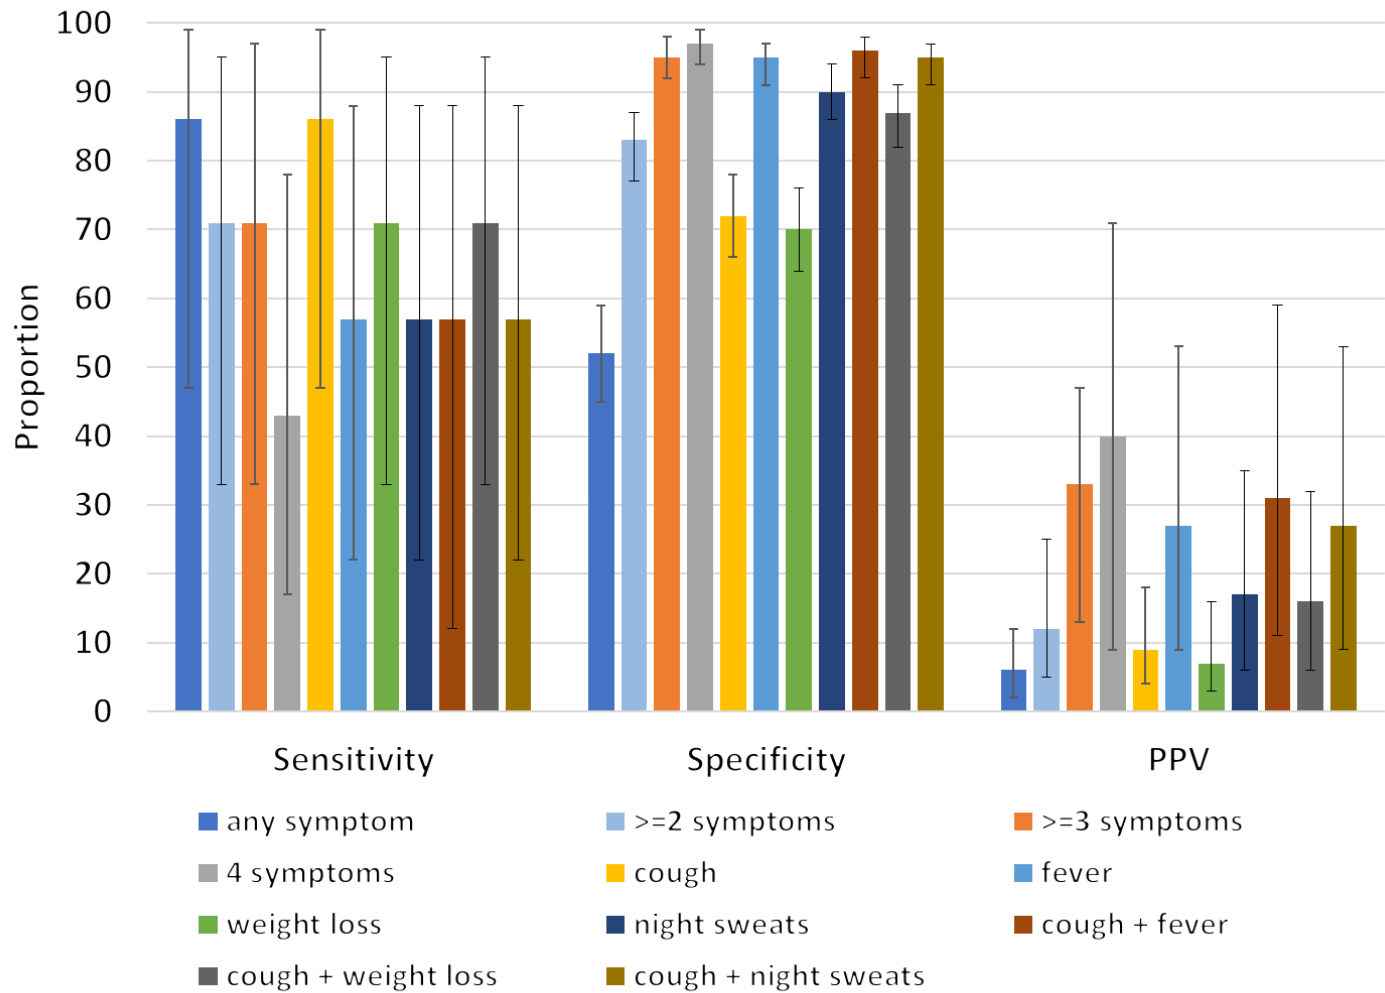

\*Negative predictive values are not shown as they remain consistent at above 98% for all analyses.

Supplementary Fig 1. SLATE I algorithm to support same-day HIV treatment initiation [7]



## Supplementary Fig 2. SLATE II algorithm to support same-day HIV treatment initiation [8]

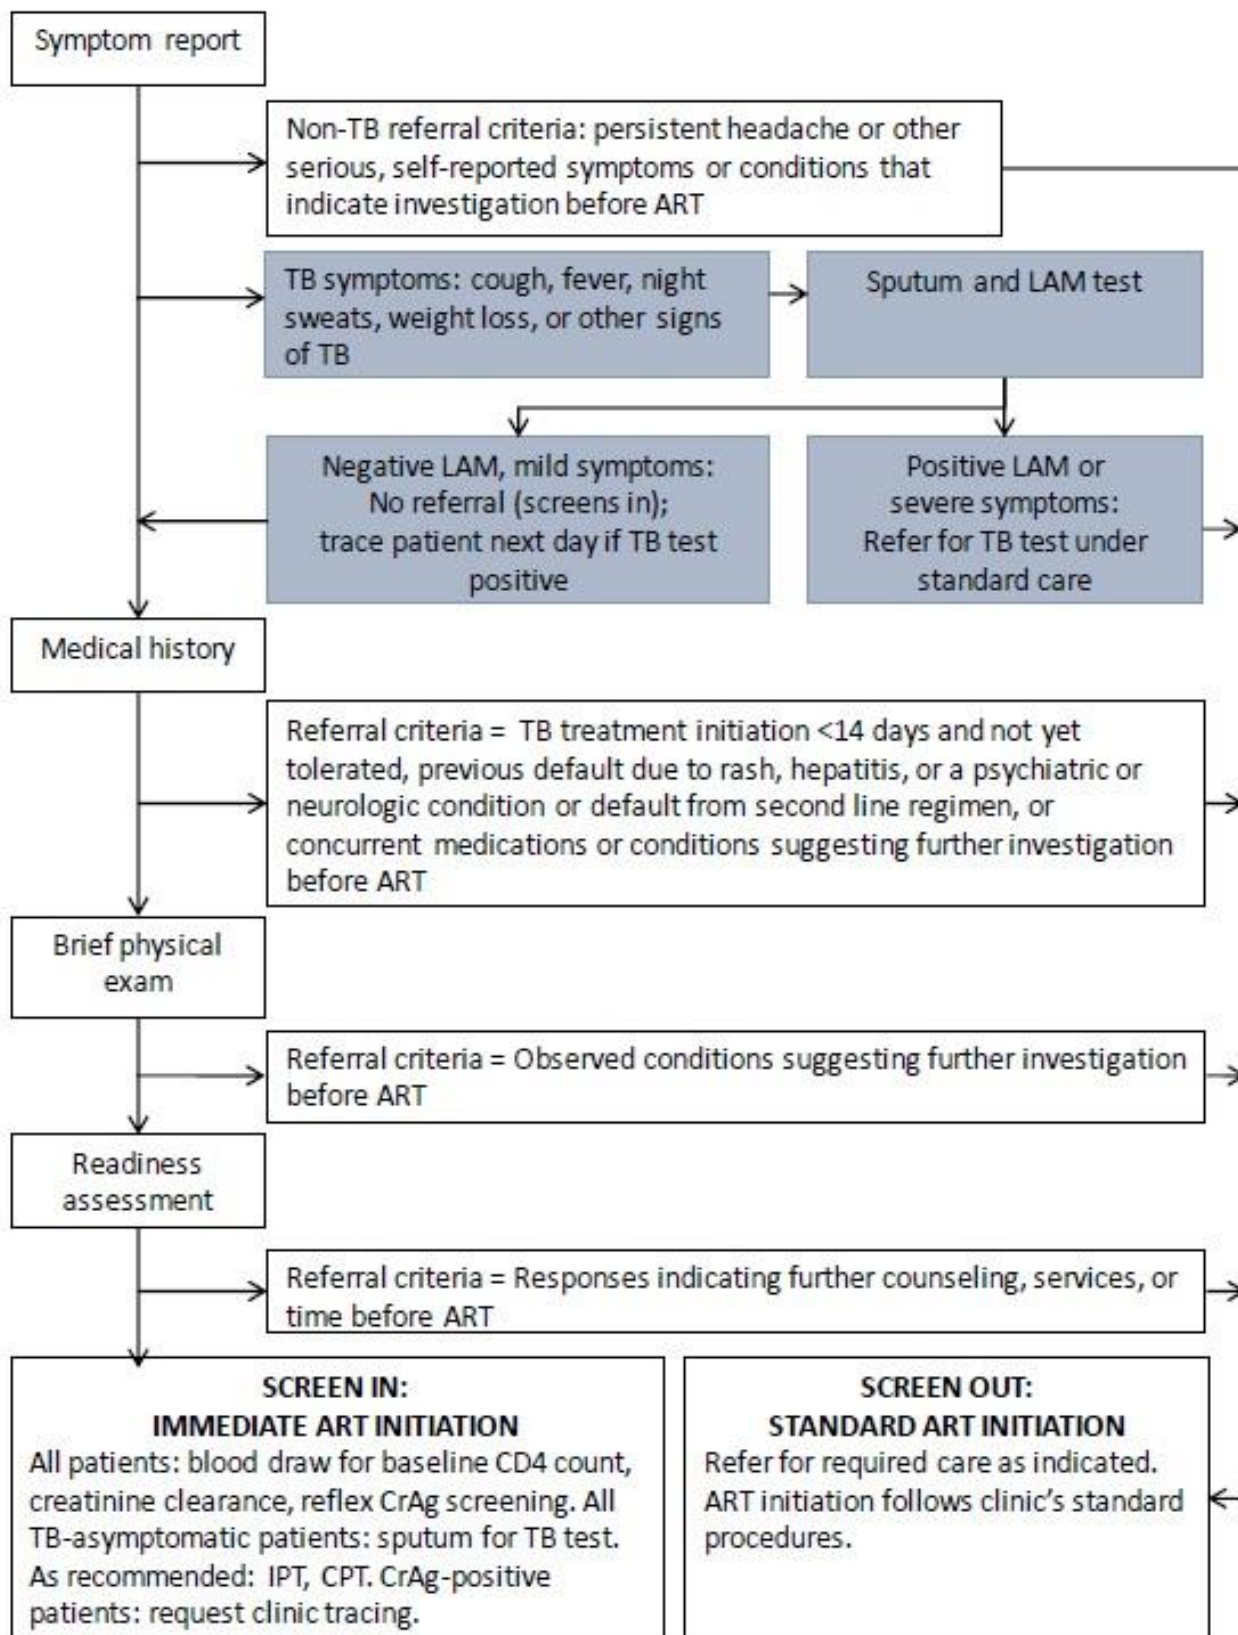

**Supplementary Table 1. Characteristics of patients at enrollment in Kenya and South Africa SLATE I and SLATE II trials**

| Variables†                                                       | Categories                      | Intervention arm                 | Intervention arm                       | Intervention arm                        |
|------------------------------------------------------------------|---------------------------------|----------------------------------|----------------------------------------|-----------------------------------------|
|                                                                  |                                 | Kenya (SLATE I)<br>(N = 240)     | South Africa<br>(SLATE I)<br>(N = 298) | South Africa<br>(SLATE II)<br>(N = 296) |
|                                                                  |                                 | n (%)                            | n (%)                                  | n (%)                                   |
| Period of enrollment                                             |                                 | July 13, 2017-<br>April 27, 2018 | March 6, 2017-<br>July 28, 2017        | March 14-<br>Sept 18, 2018              |
| Sex                                                              | Female                          | 142 (59)                         | 189 (63)                               | 189 (64)                                |
| Age                                                              | Median (IQR)                    | 36 (29, 44)                      | 34 (29, 41)                            | 35 (29, 41)                             |
| CD4 count at enrollment<br>(cells/mm <sup>3</sup> )              | Median (IQR)                    | 272 (124, 522)                   | 275 (132, 459)                         | 294 (135, 464)                          |
| Location of current<br>residence                                 | Town (urban)                    | 35 (15)                          | 18 (6)                                 | 31 (10)                                 |
|                                                                  | Peri-urban                      | 66 (28)                          | 299 (89)                               | 265 (90)                                |
|                                                                  | Rural home or village           | 139 (58)                         | 14 (5)                                 | 0 (0)                                   |
| Current house is primary<br>residence                            | Yes                             | 154 (64)                         | 141 (47)                               | 128 (43)                                |
| Number other persons in<br>house                                 | Median (IQR)                    | 3 (2, 5)                         | 2 (1, 3)                               | 1 (1, 3)                                |
| Usual activity when well                                         | Formal employment               | 18 (8)                           | 82 (28)                                | 69 (23)                                 |
|                                                                  | Informal sector work            | 161 (67)                         | 80 (27)                                | 70 (24)                                 |
|                                                                  | Unemployed, looking<br>for work | 12 (5)                           | 107 (36)                               | 138 (47)                                |
|                                                                  | Other                           | 9 (4)                            | 29 (10)                                | 12 (4)                                  |
| Transport mode to clinic<br>today (multiple choices<br>possible) | Minibus or taxi                 | 118 (49)                         | 122 (41)                               | 110 (37)                                |
|                                                                  | Walking                         | 46 (19)                          | 156 (53)                               | 161 (54)                                |
|                                                                  | Private car                     | 11 (5)                           | 19 (19)                                | 25 (8)                                  |
|                                                                  | Motorbike                       | 137 (57)                         | 0 (0)                                  | 0 (0)                                   |

**Supplementary Table 2. Median CD4 count (cells/mm<sup>3</sup>) for patients with and without TB symptoms and those with TB diagnosis in SLATE I and SLATE II trials**

| Variable                                                     | Median CD4 Count<br>Intervention arm<br>Kenya (SLATE I) |               | Median CD4 Count<br>Intervention arm<br>South Africa (SLATE I) |               | Median CD4 Count<br>Intervention arm<br>South Africa (SLATE II) |               |
|--------------------------------------------------------------|---------------------------------------------------------|---------------|----------------------------------------------------------------|---------------|-----------------------------------------------------------------|---------------|
|                                                              | n (%)                                                   | Median (IQR)  | n (%)                                                          | Median (IQR)  | n (%)                                                           | Median (IQR)  |
| <b>No TB symptoms</b>                                        | 148 (62)                                                | 357 (191-632) | 191 (63)                                                       | 307 (141-486) | 156 (53)                                                        | 405 (210-547) |
| <b>TB symptom positive</b>                                   | 90 (38)                                                 | 152 (64-329)  | 105 (37)                                                       | 245 (125-425) | 140 (47)                                                        | 175 (89-365)  |
| <b>TB symptom presence</b>                                   |                                                         |               |                                                                |               |                                                                 |               |
| Cough (current)                                              | 75 (83)                                                 | 144 (58-319)  | 71 (68)                                                        | 274 (132-433) | 76 (54)                                                         | 157 (68-416)  |
| Fever                                                        | 53 (59)                                                 | 136 (49-316)  | 45 (43)                                                        | 230 (78-368)  | 20 (14)                                                         | 110 (73-203)  |
| Night sweats                                                 | 56 (62)                                                 | 215 (56-388)  | 44 (42)                                                        | 229 (176-368) | 29 (21)                                                         | 135 (101-367) |
| Weight loss                                                  | 72 (80)                                                 | 146 (53-319)  | 76 (72)                                                        | 251 (133-433) | 96 (69)                                                         | 157 (68-337)  |
| <b>TB symptoms</b>                                           |                                                         |               |                                                                |               |                                                                 |               |
| 1 symptom                                                    | 13 (14)                                                 | 207 (147-317) | 36 (34)                                                        | 188 (72-295)  | 89 (64)                                                         | 250 (98-369)  |
| 2 symptoms                                                   | 18 (20)                                                 | 95 (64-232)   | 27 (26)                                                        | 373 (227-520) | 32 (23)                                                         | 137 (76-342)  |
| 3 symptoms                                                   | 29 (32)                                                 | 232 (72-406)  | 22 (21)                                                        | 216 (76-368)  | 8 (6)                                                           | 165 (63-350)  |
| 4 symptoms                                                   | 30 (33)                                                 | 116 (24-277)  | 20 (19)                                                        | 267 (180-423) | 11 (8)                                                          | 106 (68-157)  |
| <b>Symptom prevalence<br/>in those diagnosed<br/>with TB</b> |                                                         | <b>n=12</b>   |                                                                | <b>n=9</b>    |                                                                 | <b>n=7</b>    |
| Cough (current)                                              | 12 (100)                                                | 124 (12-150)  | 9 (100)                                                        | 251 (47-288)  | 6 (86)                                                          | 92 (60-107)   |
| Fever                                                        | 9 (75)                                                  | 114 (12-150)  | 7 (78)                                                         | 201 (18-339)  | 4 (57)                                                          | 92 (69-107)   |
| Night sweats                                                 | 12 (100)                                                | 142 (55-224)  | 7 (78)                                                         | 201 (18-288)  | 4 (57)                                                          | 69 (40-92)    |
| Weight loss                                                  | 10 (83)                                                 | 124 (12-150)  | 9 (100)                                                        | 251 (47-288)  | 5 (71)                                                          | 78 (60-106)   |
