# Supplementary material for: Prevalence of TB symptoms, diagnosis and treatment among people living with HIV (PLHIV) not on ART presenting at outpatient clinics in South Africa and Kenya: baseline results from a clinical trial
Source: PubMed Central journal article supplement (PMC7476481; doi:10.1136/bmjopen-2019-035794), 2020-09-06

Supplementary Fig 1. SLATE I algorithm to support same-day HIV treatment initiation [7]

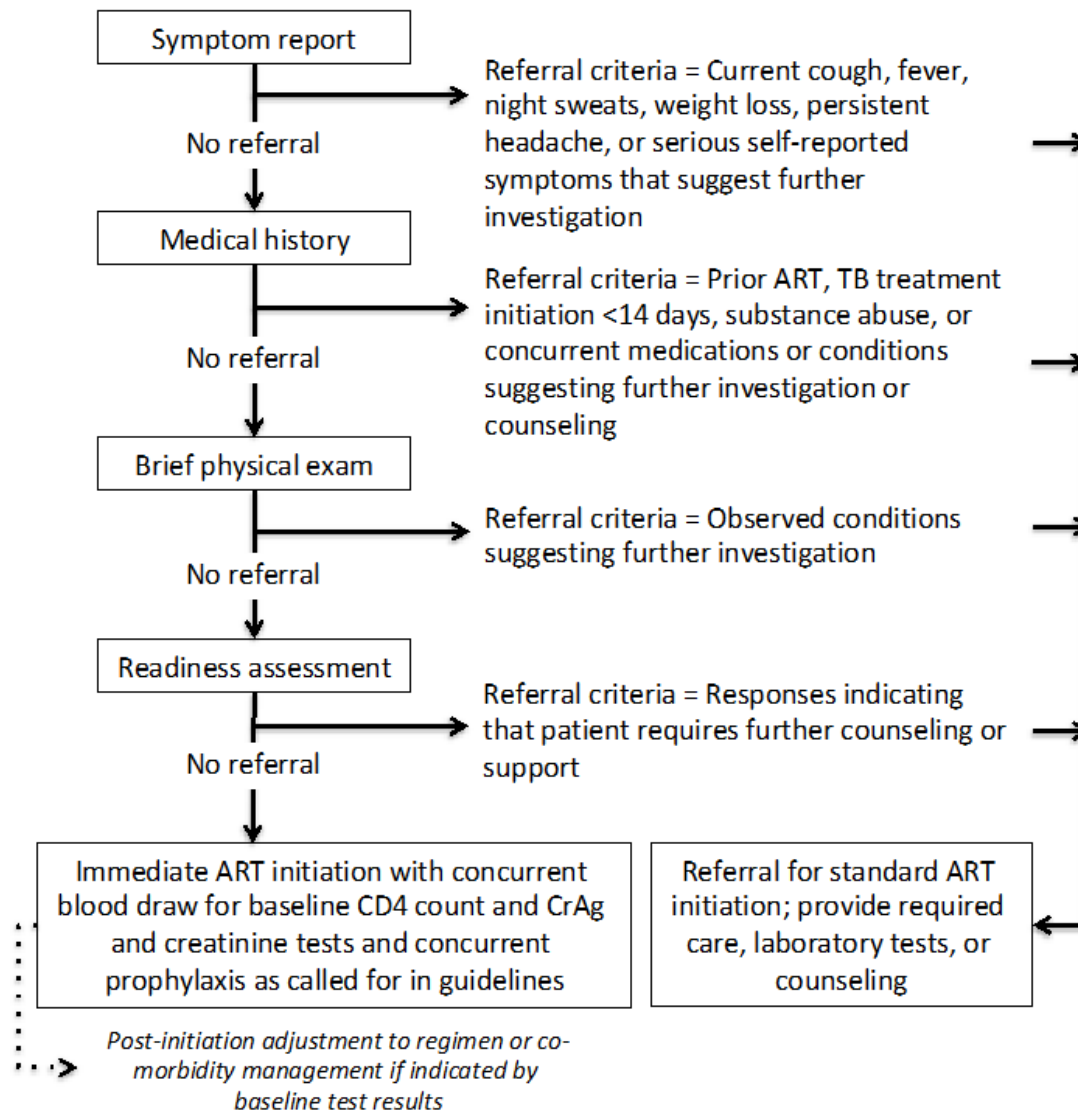

Supplement: bmjopen-2019-035794supp001.pdf [file bmjopen-2019-035794supp001.pdf]
